# Supplementary material for: Sequence-dependent recruitment of SRSF1 and SRSF7 to intronless lncRNA NKILA promotes nuclear export via the TREX/TAP pathway
Source: PubMed Central journal article supplement — Nucleic Acids Res. 2021 Jun 7;49(11):6420–36. doi: 10.1093/nar/gkab445 (PMC8216466; doi:10.1093/nar/gkab445), 2021-06-07
Supplement: gkab445_supplemental_file.pdf [file gkab445_supplemental_file.pdf]

# Supplementary Data

Supplementary Fig. S1

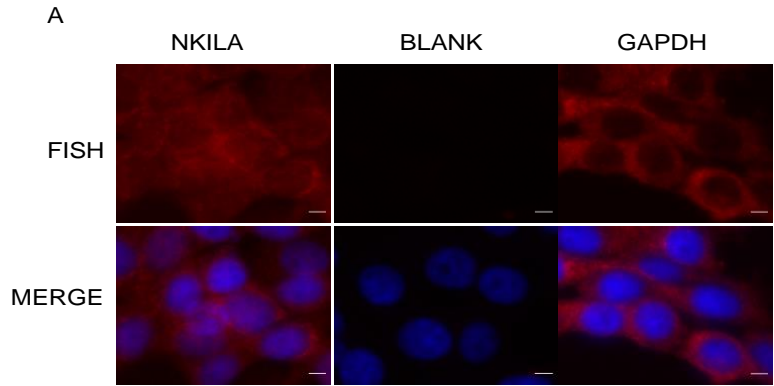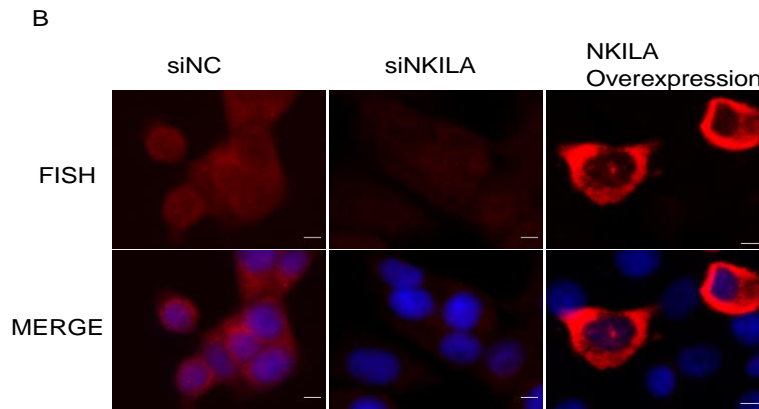

**C**

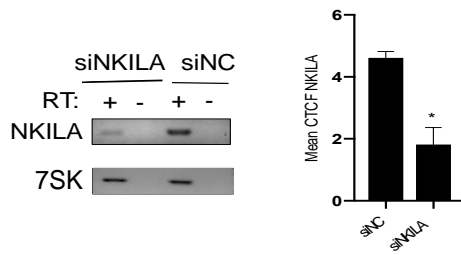

Supplementary Fig. S2

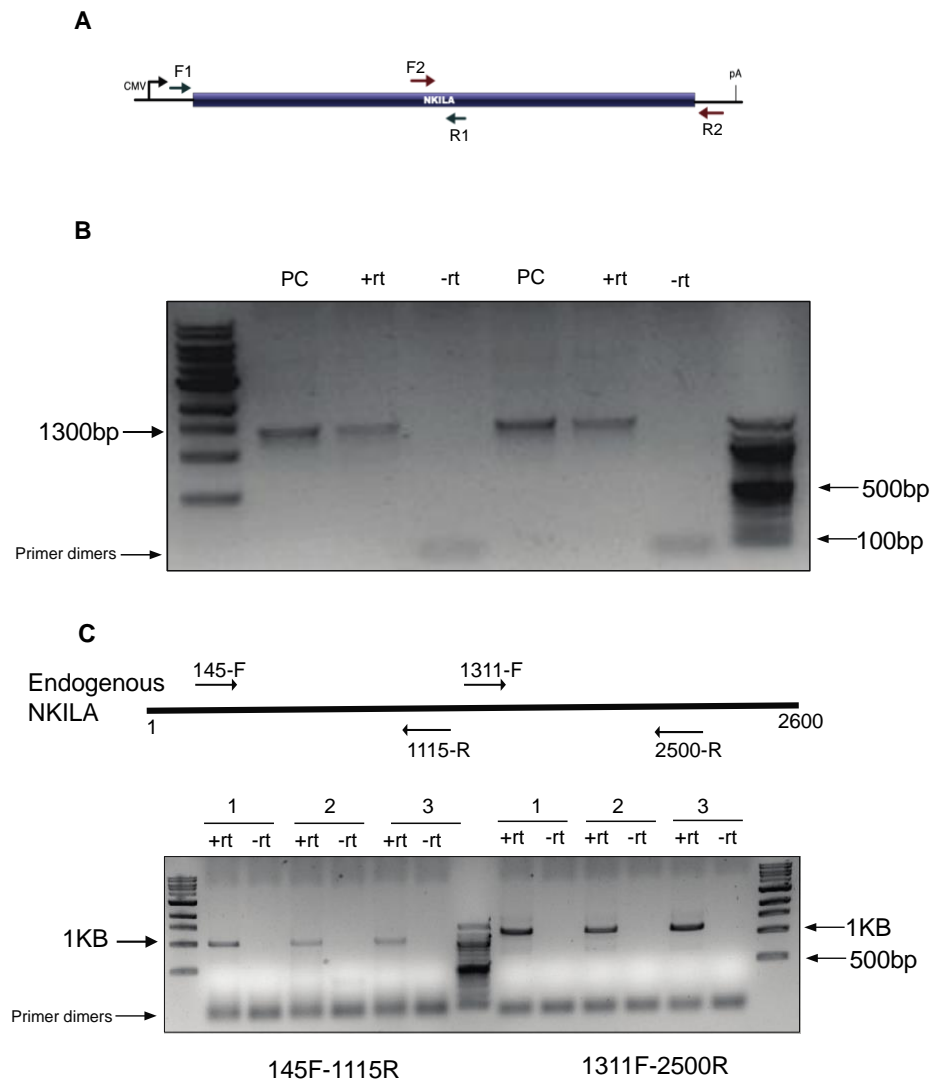

Supplementary Fig. S3

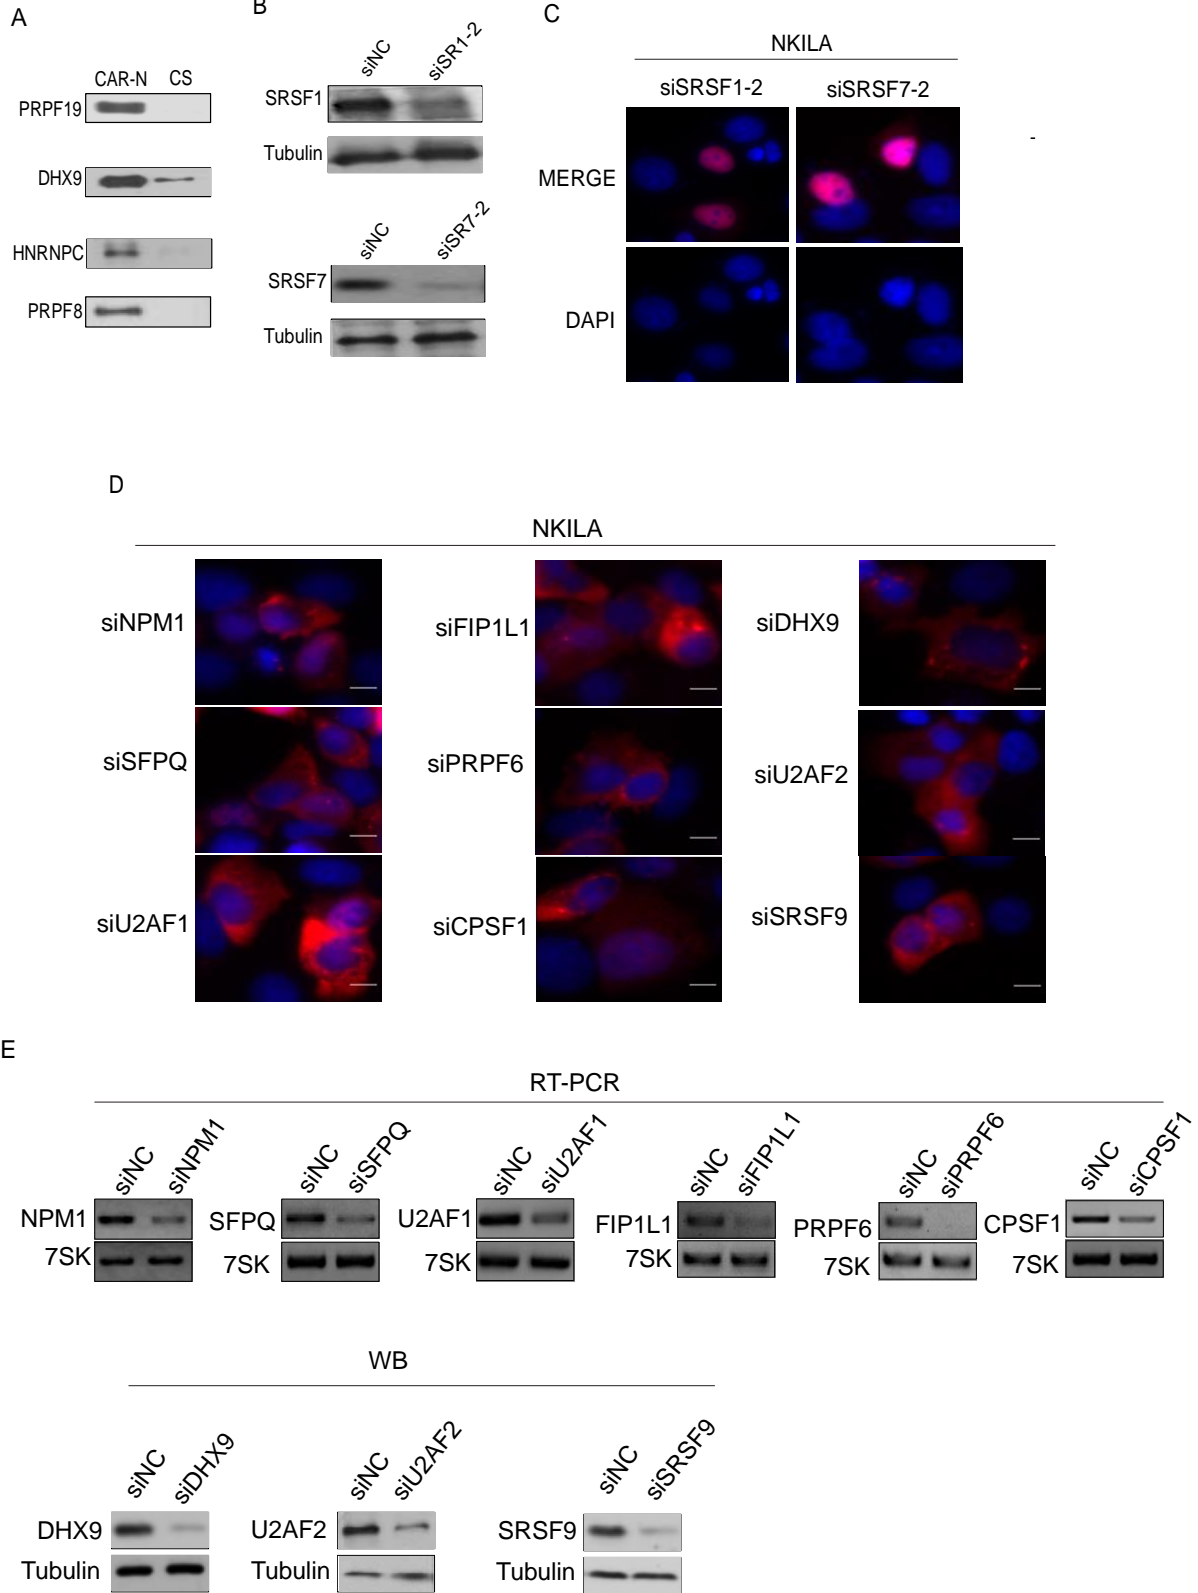

## Supplementary Figure Legends

### Supplementary Figure S1: Endogenous NKILA is predominately located in the cytoplasm.

A) RNA-FISH showing the localization of endogenous NKILA using Stellaris. RNA-FISH of GAPDH mRNA was used as the positive control. Blank sample (without FISH probe) was used as the negative control. Scale bar = 15  $\mu\text{m}$ . B) Comparison of FISH signal for endogenous NKILA in cells transfected with siNC, siNKILA, and after NKILA overexpression. C) RT-PCR to check expression level of NKILA after transfection with siNKILA. +rt: with reverse transcriptase, -rt: negative control without reverse transcriptase. 7SK was used as the loading control for RT-PCR. Right panel showing the corrected total cell fluorescence (CTCF) quantified by ImageJ after two independent experiments. (n=2, approximately 20 cells in each image were quantified. \*: p<0.05).

### Supplementary Figure S2: RT-PCR assay to exclude potential cryptic splicing in NKILA.

A) Schematic to show the NKILA reporter. Arrows indicate the position of primers used in RT PCR. F: forward primer, R: reverse primer. B) RT-PCR after transfection of NKILA reporter showing no cryptic splicing. +rt: with reverse transcriptase, -rt: negative control without reverse transcriptase, PC: positive control with plasmid DNA used as the PCR template. C) RT-PCR of endogenous NKILA. Arrows indicate the position of primers and the digits are nucleotide number of primers. 1, 2, 3 represent three independent experiments.

**Supplementary Figure S3: Effect of siRNA treatment targeting CAR-N RNP components on NKILA export.**

A) Validation of identified proteins in the RNP by western blot. B) Western blot showing relative protein level after siRNA2 treatment of SRSF1 and SRSF7. C) RNA-FISH showing the localization of NKILA. D) RNA-FISH showing the localization of overexpressed NKILA after treatment with indicated siRNA in MCF-7 cells. Scale bar = 10  $\mu$ m. E) RT-PCR and western blotting analyses were used to check the knockdown efficiency after siRNA treatment. 7SK and tubulin were used as the loading control for RT-PCR and western blotting, respectively.

**Supplementary Table S1,****Primer sequences for cloning or RT-PCR**

| <b>Target</b>                   | <b>Fwd Seq (5'-----&gt;3')</b>          | <b>Rev Seq (5'-----&gt;3')</b>               |
|---------------------------------|-----------------------------------------|----------------------------------------------|
| NKILA                           | TTCAGCCACTCCAGACACAG                    | CAAGCGTTGTGGGTAGGTTT                         |
| MEG3-<br>cDNA-<br>Reporter      | TATGGTACCAGCCCCTAGCGCA<br>GACG          | ATCTCGAGGAGAGCACAGTGGGG<br>TGCG              |
| Truncation<br>(Fig.2A-b)        | ATAGGTACCAGACCCGGCACCC<br>GCGCAAC       | CATCTCGAGGAGGTCAAGCGTTG<br>TGGGTA            |
| Truncation<br>(Fig.2A-c)        | ATAGGTACCAGACCCGGCACCC<br>GCGCAAC       | ATACTCGAGCCTCTGGGCTGGGC<br>ACGCTT            |
| Truncation<br>(Fig.2A-d)        | ATAGGTACCAGACCCGGCACCC<br>GCGCAAC       | ATACTCGAGTGCTCATACCCCTTT<br>TGAAC            |
| Truncation<br>(Fig.2A-e)        | GGAGGTACCAATTACAGGAGTG<br>CTACAAGAA     | AACCTCGAGCCAGTTAAATTGAG<br>ATATACTTAC        |
| Truncation<br>(Fig.2A-f)        | TTGGGTACCACTCAACCTGACA<br>CCGACTC       | AACCTCGAGCCAGTTAAATTGAG<br>ATATACTTAC        |
| Truncation<br>(Fig.2A-g)        | GAAGGTACCCTCGCGTAGACAC<br>GCCCGGA       | AACCTCGAGCCAGTTAAATTGAG<br>ATATACTTAC        |
| Truncation<br>(Fig.2A-h)        | TAAGGTACCTCTTCTGAGGAGC<br>ACAAGGT       | AACCTCGAGCCAGTTAAATTGAG<br>ATATACTTAC        |
| Deletion<br>(Fig.2A-i)<br>1-196 | ATAGGTACCAGACCCGGCACCC<br>GCGCAAC       | GCACTCCTGTAATTTAGGCTAGC<br>CCCAAGAGCCTGGGTCA |
| Deletion<br>(Fig.2A-i)          | CTTGGGGCTAGCCTAAATTACA<br>GGAGTGCTACAAG | AACCTCGAGCCAGTTAAATTGAG<br>ATATACTTAC        |

|                                    |                                            |                                            |
|------------------------------------|--------------------------------------------|--------------------------------------------|
| 601-2597                           |                                            |                                            |
| Deletion<br>(Fig.2A-j)1-196        | ATAGGTACCAGACCCGGCACCC<br>GCGCAAC          | GCAGCAGACAATGGTAGGCTAGC<br>CCCAAGAGCCTGGG  |
| Deletion<br>(Fig.2A-j)<br>501-2597 | CTTGGGGCTAGCCTACCATTGTC<br>TGCTGCCCAAGGGGC | AACCTCGAGCCAGTTAAATTGAG<br>ATATACTTAC      |
| Deletion<br>(Fig.2A-k)<br>1-196    | ATAGGTACCAGACCCGGCACCC<br>GCGCAAC          | CGTGTCTACGCGAGTAGGCTAGC<br>CCCAAGAGCCTGGGT |
| Deletion<br>(Fig.2A-k)<br>401-2597 | CTTGGGGCTAGCCTACTCGCGT<br>AGACACGCCCGGAAGC | AACCTCGAGCCAGTTAAATTGAG<br>ATATACTTAC      |
| Deletion<br>(Fig.2A-l)<br>1-196    | ATAGGTACCAGACCCGGCACCC<br>GCGCAAC          | CTGAAGGCGGACAGTAGGCTAGC<br>CCCAAGAGCCTGG   |
| Deletion<br>(Fig.2A-l)<br>301-2597 | TTGGGGCTAGCCTACTGTCCGC<br>CTTCAGTTCTCCAG   | AACCTCGAGCCAGTTAAATTGAG<br>ATATACTTAC      |
| Deletion<br>(Fig.2A-m)<br>1-250    | ATAGGTACCAGACCCGGCACCC<br>GCGCAAC          | CGACAATACACCAGCTTTCTCCA<br>ATTTCTCTTCCCT   |
| Deletion<br>(Fig.2A-m450-<br>2597) | AAATTGGAGAAAGCTGGTGTAT<br>TGTCGCCGCCCA     | AACCTCGAGCCAGTTAAATTGAG<br>ATATACTTAC      |
| NKILA-nt-<br>250-450<br>(Fig.2N)   | CTAGGTACCGGGGGAGGAAGCC<br>CCCAAGA          | AGACTCGAGTCCCCGACAGCTAT<br>TTACATG         |

|                                                       |                                         |                                             |
|-------------------------------------------------------|-----------------------------------------|---------------------------------------------|
| NKILA-nt-1773-1973                                    | AATGGTACCTCAGCCACTCCAG<br>ACACAGCCC     | ATACTCGAGTGGGAGGTCAAGCG<br>TTGTGGGT         |
| CAR-N-5' $\beta$ -globin cDNA (CAR-N)                 | GGTACCGGGGGAGGAAGCCCC<br>AAGA           | TCAGATGCACCATTCCCCGACAG<br>CTATTTACATG      |
| CAR-N-5' $\beta$ -globin cDNA ( $\beta$ -globin cDNA) | AGCTGTCGGGGAATGGTGCATC<br>TGACTCCTGAGG  | CTCGAGTTAGTGATACTTGTGGG<br>CCAGG            |
| CS-5'- $\beta$ globin-cDNA (CS)                       | AATGGTACCTCAGCCACTCCAG<br>ACACAGCCC     | GATGCACCATTGGGAGGTCAAGC<br>GTTGTGG          |
| CS-5'- $\beta$ globin cDNA ( $\beta$ -globin cDNA)    | TGACCTCCCAATGGTGCATCTG<br>ACTCCTGA      | CTCGAGTTAGTGATACTTGTGGG<br>CCAGG            |
| GAS5cdna-Reporter                                     | CGGGGTACCTTTCGAGGTAGGA<br>GTCGACTCCTGTG | CGCGGATCCAAAATTGGAGACAC<br>TGTTTTAATCTTCTTG |
| CAR-N-5' GAS5 cDNA (CAR-N)                            | GGTACCGGGGGAGGAAGCCCC<br>AAGA           | TACCTCGAAATCCCCGACAGCTA<br>TTTACATGAC       |
| CAR-N-5' GAS5cDNA (GAS5)                              | AGCTGTCGGGGATTTCGAGGTA<br>GGAGTCGA      | GCGCTCGAGAAAATTGGAGACAC<br>TGTTTT           |
| CS5'GAS5                                              | AATGGTACCTCAGCCACTCCAG                  | TACCTCGAAATGGGAGGTCAAGC                     |



|                               |                                    |                                   |
|-------------------------------|------------------------------------|-----------------------------------|
| cDNA(CS)                      | ACACAGCCC                          | GTTGTGGG                          |
| CS-5' GAS5 cDNA(GAS)          | TGACCTCCCATTTTCGAGGTAGG<br>AGTCGAC | GCGCTCGAGAAAATTGGAGACAC<br>TGTTTT |
| 5srRNA                        | GGCCATACCACCCTGAACGC               | GGCCATACCACCCTGAACGC              |
| NKILA-Reporter-PCR-1 (Fig.S2) | AATACGACTCACTATAGGG                | ATACTCGAGCCTCTGGGCTGGGC<br>ACGCTT |
| NKILA-Reporter-PCR-2 (Fig.S2) | TGCCCAGCCCAGAGGGAGGTTC<br>AG       | TAGAAGGCACAGTCGAGG                |
| NPM1                          | TCCGGATGACTGACCAAGAG               | CAAGCAAAGGGTGGAGTTCC              |
| SFPQ                          | TGCCCTTTCTGTTTCGTAATCTT            | TCCCTTTGCTGTTTTTCCAT              |
| U2AF1                         | ATCCCGGGAGCGTCGTTC                 | CCCCTTATGAACTGGTTTGGTC            |
| FIP1L1                        | CGTGCATGTGCACAGTGATT               | CATACTGTGGTGCTCCCGTT              |
| PRPF6                         | CCTATGAAAATGCCCGCAAGG              | TGTCACATTCCTCGGCATCC              |
| CPSF1                         | GTACGCCGTGTACAAACAGG               | GGGTCTTCAGGTCATGGGTG              |
| GAPDH                         | CTGAGTACGTCGTGGAGTCC               | AGGCAGGGATGATGTTCTGG              |
| 7SK                           | GACATCTGTCACCCCATTGA               | GCCTCATTTGGATGTGTCTG              |
| NKILA Endogenous F1           | CCCCTCGCCCCCGTCCCTGG               | ACTTCCCAAATTCCAGCTTTTCC           |

|                           |                      |                     |
|---------------------------|----------------------|---------------------|
| NKILA<br>Endogenous<br>F2 | TCTTTGGAGGAGTCCAAGCG | GCACACACGAAGCCTCCTA |
|---------------------------|----------------------|---------------------|

**Supplementary Table S2,**  
**siRNA sequences/IDs**

| <b>Target</b> | <b>Sense (5'-----→3')</b> | <b>Antisense (5'-----→3')</b> |
|---------------|---------------------------|-------------------------------|
| siUAP56       | GGGCUUGGCUAUCACAUUU       | AAAUGUGAUAGCCAAGCCC           |
| siURH49       | AAAGGCCUAGCCAUCACUUU      | AAAGUGAUGGCUAGGCCUUU          |
| siTAP/NXF1    | GCGCCAUUCGCGAACGA         | AAUCGUUCGCGAAUGGCGC           |
| siTHOC2       | GGUUAUGCCAAGCUGAUUG       | CAAUCAGCUUGGCAUAACC           |
| siALYREF      | siB09826163427            | siB09826163427                |
| siSRSF1       | ACGAUUGCCGCAUCUACGU       | ACGUAGAUGCGGCAAUCGU           |
| siSRSF1-2     | stB0007827A               | stB0007827A                   |
| siSRSF7       | AGGAGAGUUAGAAAGGGCU       | AGCCCUUUCUAACUCUCCU           |
| siSRSF7-2     | stB0007832A               | stB0007832A                   |
| siNPM1        | CGAAGGCAGUCCAAUUAAA       | UUUAAUUGGACUGCCUUCG           |
| siSFPQ        | stB0007825C               | stB0007825C                   |
| siDHX9        | GUAAAUGAACGUAUGCUGA       | UCAGCAUACGUUCAUUUAC           |
| siSRSF9       | stB0008682A               | stB0008682A                   |
| siU2AF2       | GCACGGUGGACUGAUUCGU       | ACGAAUCAGUCCACCGUGC           |
| siU2AF1       | stB0008214A               | stB0008214A                   |
| siFIPIL1      | StB0013863A               | StB0013863A                   |
| siPRPF6       | GAGAAGAUUGGGCAGCUUA       | TAAGCTGCCCAATCTTCTC           |

|         |                     |                     |
|---------|---------------------|---------------------|
| siCPSF1 | siG13108180752      | siG13108180752      |
| siNKILA | GGGCAGUAGGAAAGGAGAA | UUCUCCUUUCCUACUGCCC |

**Supplementary Table S3**  
**Proteins Identified by Mass Spec in RNP purification**

| Description                                    | Symbol  | # Peptides<br>CAR-N | #<br>Peptides<br>CS | MW<br>[kDa] | CAR-N<br>total Peptides/ MW |
|------------------------------------------------|---------|---------------------|---------------------|-------------|-----------------------------|
| Nucleophosmin                                  | NPM1    | 21                  | 2                   | 32.6        | 0.645                       |
| Splicing factor, proline- and glutamine-rich   | SFPQ    | 30                  | 8                   | 76.1        | 0.394                       |
| Septin 9, isoform CRA_a                        | Septin9 | 24                  | 1                   | 63.6        | 0.377                       |
| Serine/arginine-rich splicing factor 1         | SRSF1   | 10                  | 1                   | 27.7        | 0.360                       |
| Probable ATP-dependent RNA helicase DDX17      | DDX17   | 28                  | 9                   | 80.2        | 0.349                       |
| Caprin-1 (Fragment)                            | CAPRIN1 | 6                   |                     | 20.2        | 0.296                       |
| SNRPG protein                                  | SNRPG   | 2                   |                     | 7.1         | 0.281                       |
| Heterogeneous nuclear ribonucleoproteins C1/C2 | HNRNPC  | 7                   |                     | 25.2        | 0.277                       |
| X-ray repair cross-complementing protein 6     | XRCC6   | 19                  | 7                   | 69.8        | 0.272                       |
| RPS4X protein (Fragment)                       | RPS4X   | 7                   |                     | 27.2        | 0.256                       |
| Replication factor C subunit 5 (Fragment)      | RFC5    | 3                   |                     | 11.9        | 0.252                       |
| ATP-dependent RNA helicase DDX3X               | DDX3X   | 17                  | 5                   | 69.0        | 0.246                       |
| X-ray repair cross-complementing protein 5     | XRCC5   | 20                  | 7                   | 82.7        | 0.241                       |
| ATP-dependent RNA helicase A                   | DHX9    | 34                  | 20                  | 140.9       | 0.241                       |
| Lamina-associated polypeptide 2, isoform alpha | TMPO    | 17                  |                     | 75.4        | 0.225                       |
| Cold-inducible RNA-binding protein (Fragment)  | CIRBP   | 2                   |                     | 8.9         | 0.224                       |
| Small nuclear ribonucleoprotein Sm D2          | SNRPD2  | 3                   | 1                   | 13.5        | 0.221                       |

|                                                                  |          |    |   |       |       |
|------------------------------------------------------------------|----------|----|---|-------|-------|
| Serine/arginine-rich-splicing factor 9                           | SRSF9    | 3  |   | 13.8  | 0.217 |
| Polyadenylate-binding protein 1                                  | PABPC1   | 15 |   | 70.6  | 0.212 |
| FBL protein (Fragment)                                           | FBL      | 6  |   | 28.4  | 0.211 |
| RPL27/NME2 fusion protein (Fragment)                             | RPL27    | 3  |   | 14.2  | 0.210 |
| DNA topoisomerase 1                                              | TOP1     | 19 |   | 90.7  | 0.209 |
| Nucleolin, isoform CRA_c                                         | NCL      | 12 |   | 58.5  | 0.205 |
| Receptor of activated protein C kinase 1                         | RACK1    | 7  | 2 | 35.1  | 0.199 |
| ELAV-like protein 1                                              | ELAVL1   | 7  | 1 | 36.1  | 0.194 |
| Septin-2                                                         | Septin2  | 8  |   | 41.5  | 0.192 |
| Cleavage and polyadenylation-specificity factor subunit 6        | CPSF6    | 10 |   | 52.2  | 0.191 |
| RNA-binding motif protein, X chromosome                          | RBMX     | 8  | 4 | 42.3  | 0.189 |
| Histone H1.2                                                     | HIST1H1C | 4  |   | 21.4  | 0.187 |
| Nucleolar RNA helicase 2                                         | DDX21    | 16 |   | 87.3  | 0.183 |
| Proliferation-associated protein 2G4                             | PA2G4    | 8  |   | 43.8  | 0.182 |
| Tropomyosin alpha-3 chain                                        | TPM3     | 2  |   | 11.0  | 0.181 |
| Histone H1.5                                                     | HIST1H1B | 4  |   | 22.6  | 0.177 |
| Pre-mRNA-processing factor 19                                    | PRPF19   | 9  |   | 55.1  | 0.163 |
| Polypyrimidine tract binding protein 1, isoform CRA_b            | PTBP1    | 9  | 1 | 56.5  | 0.159 |
| U2 small nuclear ribonucleoprotein B"                            | SNRPB2   | 4  | 2 | 25.5  | 0.157 |
| THO complex subunit 4                                            | ALYREF   | 4  |   | 26.9  | 0.148 |
| U2 snRNP auxiliary factor large subunit                          | U2AF2    | 5  |   | 33.9  | 0.147 |
| Glyceraldehyde-3-phosphate dehydrogenase                         | GAPDH    | 4  | 1 | 27.9  | 0.143 |
| Splicing factor U2AF 35 kDa subunit                              | U2AF1    | 4  |   | 27.9  | 0.143 |
| Poly [ADP-ribose] polymerase 1                                   | PARP1    | 16 |   | 113.0 | 0.141 |
| Serine/threonine-protein phosphatase PP1-alpha catalytic subunit | PPP1CA   | 5  |   | 37.5  | 0.133 |
| Serine/arginine-rich-splicing factor 7                           | SRSF7    | 2  |   | 15.8  | 0.126 |

|                                                                 |          |    |   |       |       |
|-----------------------------------------------------------------|----------|----|---|-------|-------|
| tRNA-splicing ligase RtcB homolog                               | RTCB     | 7  |   | 55.2  | 0.126 |
| Mitotic checkpoint protein BUB3 (Fragment)                      | BUB3     | 4  |   | 31.7  | 0.126 |
| ATP-dependent RNA helicase DDX39A                               | DDX39A   | 6  | 4 | 49.1  | 0.122 |
| ATP-dependent RNA helicase DDX1                                 | DDX1     | 9  | 3 | 73.9  | 0.121 |
| Coronin                                                         | CORO1C   | 5  |   | 41.6  | 0.120 |
| H/ACA ribonucleoprotein complex subunit DKC1 (Fragment)         | DKC1     | 3  |   | 25.8  | 0.116 |
| Protein DEK (Fragment)                                          | DEK      | 2  |   | 17.2  | 0.115 |
| RNA-binding protein 14                                          | RBM14    | 8  |   | 69.4  | 0.115 |
| Ras GTPase-activating protein-binding protein 1                 | G3BP1    | 6  |   | 52.1  | 0.115 |
| Replication factor C (Activator 1) 2, 40kDa, isoform CRA_a      | RFC2     | 4  |   | 35.2  | 0.113 |
| Eukaryotic initiation factor 4A-I (Fragment)                    | EIF4A1   | 2  |   | 18.0  | 0.110 |
| Replication factor C subunit 4                                  | RFC4     | 4  |   | 36.9  | 0.108 |
| Prelamin-A/C                                                    | LMNA     | 8  | 2 | 74.1  | 0.107 |
| Pre-mRNA 3'-end-processing factor FIP1                          | FIP1L1   | 7  |   | 66.5  | 0.105 |
| Splicing factor 3B subunit 2 (Fragment)                         | SF3B2    | 3  | 1 | 29.1  | 0.103 |
| Nucleolar transcription factor 1                                | UBTF     | 9  |   | 87.4  | 0.102 |
| RuvB-like helicase (Fragment)                                   | RUVBL1   | 5  | 2 | 50.2  | 0.099 |
| KRT18 protein (Fragment)                                        | KRT18    | 4  | 1 | 42.1  | 0.094 |
| DNA topoisomerase 2 (Fragment)                                  | TOP2B    | 17 |   | 180.5 | 0.094 |
| Coronin-1B                                                      | CORO1B   | 5  |   | 54.2  | 0.092 |
| Poly(U)-binding-splicing factor PUF60 (Fragment)                | PUF60    | 5  | 1 | 54.6  | 0.091 |
| Splicing factor 3A subunit 1                                    | SF3A1    | 8  | 2 | 88.8  | 0.090 |
| Histone H1x                                                     | H1FX     | 2  |   | 22.5  | 0.088 |
| Matrin-3                                                        | MATR3    | 8  | 4 | 94.6  | 0.084 |
| Heterogeneous nuclear ribonucleoprotein U-like 1, isoform CRA_a | HNRPUL1  | 7  | 2 | 84.7  | 0.082 |
| Septin 11, isoform CRA_b                                        | Septin11 | 4  |   | 49.0  | 0.081 |
| Poly(rC)-binding protein 1                                      | PCBP1    | 3  | 1 | 37.5  | 0.080 |

|                                                                                                                                                        |         |   |   |       |       |
|--------------------------------------------------------------------------------------------------------------------------------------------------------|---------|---|---|-------|-------|
| Methylenetetrahydrofolate dehydrogenase (NADP+ dependent) 1, methenyltetrahydrofolate cyclohydrolase, formyltetrahydrofolate synthetase, isoform CRA_a | MTHFD1  | 8 |   | 101.5 | 0.078 |
| RuvB-like 2                                                                                                                                            | RUVBL2  | 4 | 1 | 51.1  | 0.078 |
| Pre-mRNA-processing factor 6                                                                                                                           | PRPF6   | 8 |   | 106.9 | 0.074 |
| DNA-3-methyladenine glycosylase (Fragment)                                                                                                             | MPG     | 2 |   | 27.3  | 0.073 |
| GTPBP4 protein (Fragment)                                                                                                                              | GTPBP4  | 5 |   | 73.7  | 0.067 |
| Probable 28S rRNA (cytosine(4447)-C(5))-methyltransferase                                                                                              | NOP2    | 6 |   | 89.2  | 0.067 |
| DnaJ homolog subfamily C member 9                                                                                                                      | DNAJC9  | 2 |   | 29.9  | 0.066 |
| U4/U6.U5 tri-snRNP-associated protein 2                                                                                                                | USP39   | 4 |   | 62.0  | 0.064 |
| Arginine/serine-rich splicing factor 6 variant (Fragment)                                                                                              |         | 2 |   | 31.8  | 0.062 |
| Cytidine 5'-monophosphate N-acetylneuraminic acid synthetase variant (Fragment)                                                                        |         | 3 |   | 48.3  | 0.062 |
| RNA-binding protein EWS                                                                                                                                | EWSR1   | 4 | 1 | 64.9  | 0.061 |
| Dynammin-2                                                                                                                                             | DNM2    | 6 |   | 98.0  | 0.061 |
| Septin-8                                                                                                                                               | Septin8 | 3 |   | 49.3  | 0.060 |
| RNA cytidine acetyltransferase                                                                                                                         | NAT10   | 7 |   | 115.7 | 0.060 |
| RCC2 protein (Fragment)                                                                                                                                | RCC2    | 3 |   | 49.6  | 0.060 |
| NOP56 protein (Fragment)                                                                                                                               | NOP56   | 3 |   | 49.7  | 0.060 |
| Ubiquitin carboxyl-terminal hydrolase 10                                                                                                               | USP10   | 5 |   | 87.1  | 0.057 |
| CD2 antigen cytoplasmic tail-binding protein 2                                                                                                         | CD2BP2  | 2 |   | 37.6  | 0.053 |
| FACT complex subunit SPT16                                                                                                                             | SUPT16H | 6 |   | 119.8 | 0.050 |
| FACT complex subunit SSRP1                                                                                                                             | SSRP1   | 4 |   | 81.0  | 0.049 |
| NAT10 protein (Fragment)                                                                                                                               | NAT10   | 3 |   | 62.3  | 0.048 |
| Plakophilin-3                                                                                                                                          | PKP3    | 4 |   | 87.0  | 0.045 |
| DNA topoisomerase 2-alpha                                                                                                                              | TOP2A   | 8 |   | 174.3 | 0.045 |
| Fragile X mental retardation autosomal homolog variant p5FK                                                                                            | FXR1    | 3 |   | 67.2  | 0.044 |

|                                                                                  |          |    |  |       |       |
|----------------------------------------------------------------------------------|----------|----|--|-------|-------|
| U4/U6.U5 tri-snRNP-associated protein 1                                          | SART1    | 4  |  | 90.2  | 0.044 |
| Cleavage stimulation factor subunit 2                                            | CSTF2    | 2  |  | 46.6  | 0.042 |
| ACTN4 protein (Fragment)                                                         | ACTN4    | 3  |  | 73.6  | 0.040 |
| REST corepressor 1                                                               | RCOR1    | 2  |  | 53.3  | 0.037 |
| Mediator of RNA polymerase II transcription subunit 17                           | MED17    | 2  |  | 55.9  | 0.035 |
| 60 kDa U4/U6 snRNP-specific spliceosomal protein                                 | PRPF4    | 2  |  | 58.3  | 0.034 |
| Splicing factor 3B subunit 1                                                     | SF3B1    | 5  |  | 145.7 | 0.034 |
| MRE11A protein (Fragment)                                                        | MRE11A   | 2  |  | 59.7  | 0.033 |
| DNA-dependent protein kinase catalytic subunit                                   | PRKDC    | 15 |  | 468.8 | 0.031 |
| Coilin                                                                           | COIL     | 2  |  | 62.6  | 0.031 |
| Unconventional myosin-Ib                                                         | MYO1B    | 4  |  | 128.4 | 0.031 |
| DNA repair protein XRCC1                                                         | XRCC1    | 2  |  | 66.0  | 0.030 |
| RNA-binding protein 15                                                           | RBM15    | 3  |  | 102.1 | 0.029 |
| Myosin-9                                                                         | MYH9     | 6  |  | 226.4 | 0.026 |
| Cleavage and polyadenylation specific factor 1, 160kDa, isoform CRA_a            | CPSF1    | 4  |  | 151.9 | 0.026 |
| Nuclear fragile X mental retardation-interacting protein 2                       | NUFIP2   | 2  |  | 76.1  | 0.026 |
| General transcription and DNA repair factor IIIH helicase subunit XPD (Fragment) | ERCC2    | 2  |  | 80.5  | 0.024 |
| E3 ubiquitin-protein ligase UHRF1                                                | UHRF1    | 2  |  | 89.8  | 0.022 |
| RNA-binding protein 25                                                           | RBM25    | 2  |  | 100.1 | 0.019 |
| DNA mismatch repair protein Msh6                                                 | MSH6     | 3  |  | 152.7 | 0.019 |
| SNRNP200 protein (Fragment)                                                      | SNRNP200 | 4  |  | 216.0 | 0.018 |
| MORC family CW-type zinc finger protein 2                                        | MORC2    | 2  |  | 117.7 | 0.016 |
| Filamin-A                                                                        | FLNA     | 4  |  | 245.7 | 0.016 |
| Pre-mRNA processing splicing factor 8                                            | PRPF8    | 4  |  | 273.4 | 0.014 |

Note: Complete list of CAR-N enriched RNP. Proteins with total peptide numbers less than 2 were omitted.



**cDNA FLJ Sequences identified by Mass Spec**

| <b>Description</b>                                                                                                                 | <b># Peptides CAR-N</b> | <b># Peptides CS</b> | <b>MW [kDa]</b> | <b>CAR-N total Peptides/MW</b> |
|------------------------------------------------------------------------------------------------------------------------------------|-------------------------|----------------------|-----------------|--------------------------------|
| cDNA FLJ76817, highly similar to Homo sapiens non-POU domain containing, octamer-binding (NONO), mRNA                              | 26                      | 5                    | 54.3            | 0.479                          |
| cDNA FLJ57805, highly similar to Homo sapiens paraspeckle component 1 (PSPC1), transcript variant alpha, mRNA                      | 22                      | 2                    | 52.5            | 0.418                          |
| cDNA FLJ53366, highly similar to Probable ATP-dependent RNA helicase DDX5                                                          | 25                      | 11                   | 67.7            | 0.369                          |
| cDNA, FLJ93125, highly similar to Homo sapiens cleavage and polyadenylation specific factor 5, 25 kDa(CPSF5), mRNA                 | 7                       | 1                    | 26.2            | 0.267                          |
| cDNA FLJ54551, highly similar to Septin-7                                                                                          | 8                       |                      | 47.9            | 0.167                          |
| cDNA, FLJ93365, highly similar to Homo sapiens KH domain containing, RNA binding, signal transduction associated 1 (KHDRBS1), mRNA | 8                       |                      | 48.2            | 0.165                          |
| cDNA FLJ59645, highly similar to 116 kDa U5 small nuclear ribonucleoprotein component                                              | 16                      |                      | 103.8           | 0.154                          |
| cDNA FLJ53422, highly similar to TATA-binding protein-associated factor 2N                                                         | 5                       | 1                    | 40.1            | 0.124                          |
| cDNA FLJ57877, highly similar to Cleavage and polyadenylation specificity factor 7                                                 | 6                       |                      | 51.1            | 0.117                          |
| cDNA, FLJ95131, highly similar to Homo sapiens nucleolar and coiled-body phosphoprotein 1 (NOLC1), mRNA                            | 8                       |                      | 73.6            | 0.108                          |
| cDNA FLJ78677, highly similar to Homo sapiens splicing factor 3b, subunit 3, 130kDa (SF3B3), mRNA                                  | 13                      | 3                    | 135.5           | 0.095                          |
| cDNA, FLJ93750, Homo sapiens DEAD (Asp-Glu-Ala-Asp) box polypeptide 6 (DDX6), mRNA                                                 | 5                       |                      | 53.2            | 0.094                          |
| cDNA FLJ55635, highly similar to pre-mRNA-splicing factorATP-dependent RNA helicase DHX15                                          | 8                       | 1                    | 89.5            | 0.089                          |
| cDNA, FLJ94417, highly similar to Homo sapiens WD repeat domain 57 (U5 snRNP specific) (WDR57), mRNA                               | 3                       |                      | 39.2            | 0.076                          |
| cDNA FLJ51295, highly similar to Cell division cycle 5-like protein                                                                | 6                       |                      | 89.2            | 0.067                          |

|                                                                                                                              |   |  |       |       |
|------------------------------------------------------------------------------------------------------------------------------|---|--|-------|-------|
| cDNA FLJ13913 fis, clone Y79AA1000231, highly similar to Nucleolar protein NOP5                                              | 3 |  | 52.3  | 0.057 |
| cDNA FLJ57893, highly similar to Parafibromin                                                                                | 2 |  | 35.9  | 0.055 |
| cDNA FLJ51688, highly similar to Cleavage stimulation factor 50 kDa subunit                                                  | 2 |  | 46.8  | 0.042 |
| cDNA FLJ50575, highly similar to U4/U6 small nuclear ribonucleoprotein Prp3                                                  | 3 |  | 72.1  | 0.041 |
| cDNA FLJ58134, highly similar to Cleavage stimulation factor 77 kDa subunit                                                  | 3 |  | 72.1  | 0.041 |
| cDNA FLJ58737, highly similar to Splicing factor 3A subunit 3                                                                | 2 |  | 52.4  | 0.038 |
| cDNA FLJ59523, highly similar to Scaffold attachment factor B                                                                | 3 |  | 91.0  | 0.032 |
| cDNA FLJ60634, highly similar to Exosome component 10                                                                        | 2 |  | 77.7  | 0.025 |
| cDNA FLJ51771, highly similar to SWI/SNF-related matrix-associatedactin-dependent regulator of chromatin subfamily A member5 | 3 |  | 116.7 | 0.025 |
| cDNA FLJ59510, highly similar to Homo sapiens tight junction protein 2 (TJP2), transcript variant 2, mRNA                    | 2 |  | 115.1 | 0.017 |

**Supplementary Table S4:** Subset of proteins detected by mass spectrometry and categorized by Gene Ontology (GO) as RNA transport/localization/export.

| Name                                           | Symbol | Total Peptides<br>CAR-N | Total Peptides<br>CS |
|------------------------------------------------|--------|-------------------------|----------------------|
| Nucleophosmin                                  | NPM1   | 21                      | 2                    |
| Splicing factor, proline- and glutamine-rich   | SFPQ   | 30                      | 8                    |
| Serine/arginine-rich splicing factor 1         | SRSF1  | 10                      | 1                    |
| ATP-dependent RNA helicase A                   | DHX9   | 34                      | 20                   |
| Serine/arginine-rich-splicing factor 9         | SRSF9  | 3                       | -                    |
| THO complex subunit 4                          | ALYREF | 4                       | -                    |
| U2 snRNP auxiliary factor large subunit        | U2AF2  | 5                       | -                    |
| Splicing factor U2AF 35 kDa subunit            | U2AF1  | 4                       | -                    |
| Serine/arginine-rich-splicing factor 7         | SRSF7  | 2                       | -                    |
| ATP-dependent RNA helicase DDX39A              | DDX39A | 6                       | 4                    |
| Pre-mRNA 3'-end-processing factor FIP1         | FIP1L1 | 7                       | -                    |
| Pre-mRNA-processing factor 6                   | PRPF6  | 8                       | -                    |
| Cleavage and polyadenylation specific factor 1 | CPSF1  | 4                       | -                    |

Subset of proteins detected by mass spectrometry and categorized by gene ontology (GO) in RNA transport/localization/export categories in CAR-N and CS, with the number of peptides.

**Supplementary Table S5: Proteins identified by Mass Spec in SRSF1/7-IP**

| <b>Description</b>                                                                                                    | <b>Symbol</b> | <b># Peptides<br/>igG(IP)</b> | <b>#<br/>Peptides<br/>SRSF1/7<br/>(IP)</b> | <b>MW<br/>[kDa]</b> | <b>peptides in<br/>SRSF1/7/M.W</b> |
|-----------------------------------------------------------------------------------------------------------------------|---------------|-------------------------------|--------------------------------------------|---------------------|------------------------------------|
| Serine/arginine-rich splicing factor 1                                                                                | SRSF1         | 2                             | 18                                         | 27.7                | 0.649167603                        |
| Serine/arginine-rich-splicing factor 7                                                                                | SRSF7         | 1                             | 9                                          | 15.8                | 0.571326369                        |
| Alpha-actinin-4                                                                                                       | ACTN4         | 16                            | 50                                         | 104.8               | 0.477151694                        |
| Spectrin alpha chain, non-erythrocytic 1                                                                              | SPTAN1        | 27                            | 112                                        | 284.4               | 0.39386108                         |
| 60S ribosomal protein L22 (Fragment)                                                                                  | RPL22         |                               | 2                                          | 5.1                 | 0.393725449                        |
| Heterogeneous nuclear ribonucleoprotein A1                                                                            | HNRNPA1       | 1                             | 13                                         | 33.1                | 0.39233617                         |
| Serine/arginine-rich-splicing factor 3                                                                                | SRSF3         |                               | 4                                          | 10.3                | 0.387823612                        |
| X-ray repair cross-complementing protein 6                                                                            | XRCC6         |                               | 27                                         | 69.8                | 0.386824708                        |
| 40S ribosomal protein S3                                                                                              | RPS3          | 2                             | 10                                         | 26.7                | 0.374933004                        |
| Heterogeneous nuclear ribonucleoproteins A2/B1                                                                        | HNRNPA2B1     | 5                             | 14                                         | 37.4                | 0.374264219                        |
| Annexin A2                                                                                                            | ANXA2         | 3                             | 14                                         | 38.6                | 0.362884049                        |
| Serine/arginine-rich splicing factor 9                                                                                | SRSF9         | 1                             | 9                                          | 25.5                | 0.352575736                        |
| Heat shock protein beta-1                                                                                             | HSPB1         | 5                             | 8                                          | 22.8                | 0.351362721                        |
| Serine/threonine-protein phosphatase PP1-alpha catalytic subunit                                                      | PPP1CA        | 5                             | 13                                         | 37.5                | 0.346779431                        |
| cDNA, FLJ93125, highly similar to Homo sapiens cleavage and polyadenylation specific factor 5, 25 kDa(CPSF5), mRNA OS |               |                               | 9                                          | 26.2                | 0.343528437                        |
| Major vault protein                                                                                                   | MVP           |                               | 33                                         | 99.3                | 0.332440316                        |
| Actin, alpha cardiac muscle 1                                                                                         | ACTC1         | 9                             | 13                                         | 42.0                | 0.309583643                        |

|                                                                        |         |    |    |       |             |
|------------------------------------------------------------------------|---------|----|----|-------|-------------|
| cDNA FLJ51660, highly similar to Interleukin enhancer-binding factor 2 | ILF2    | 5  | 12 | 38.9  | 0.308593123 |
| Tubulin beta chain                                                     | TUBB    | 9  | 15 | 49.6  | 0.302181913 |
| Serine/threonine-protein phosphatase (Fragment)                        | PPP1CC  | 2  | 10 | 33.8  | 0.296280376 |
| Small nuclear ribonucleoprotein-associated protein                     |         | 2  | 7  | 23.6  | 0.296093631 |
| Spectrin beta chain, non-erythrocytic 2                                | SPTBN2  | 20 | 78 | 271.2 | 0.287656092 |
| Coronin                                                                | 2 SV    | 3  | 15 | 53.2  | 0.282007915 |
| Mitotic interactor and substrate of PLK1                               | MISP    | 6  | 21 | 75.3  | 0.278843897 |
| X-ray repair cross-complementing protein 5                             | XRCC5   |    | 22 | 82.7  | 0.266175356 |
| Cell division cycle and apoptosis regulator protein 1                  | CCAR1   |    | 35 | 132.7 | 0.263675163 |
| Actin-related protein 2/3 complex subunit 2                            | ARPC2   |    | 9  | 34.3  | 0.262302828 |
| RPS4X protein (Fragment)                                               | RPS4X   |    | 7  | 27.2  | 0.256949379 |
| Vesicle-associated membrane protein-associated protein B/C             | VAPB    |    | 2  | 7.8   | 0.256538944 |
| Actin-related protein 3                                                | ACTR3   | 1  | 12 | 47.3  | 0.253480158 |
| Alpha-actinin-1                                                        | ACTN1   | 5  | 26 | 103.0 | 0.25244523  |
| U2 small nuclear ribonucleoprotein A'                                  | SNRPA1  | 5  | 7  | 28.4  | 0.246495062 |
| Tubulin alpha-1C chain                                                 | TUBA1C  | 6  | 9  | 36.6  | 0.245715018 |
| Src substrate cortactin                                                | CTTN    |    | 15 | 61.5  | 0.243710109 |
| Tubulin beta-4B chain                                                  | TUBB4B  | 8  | 12 | 49.8  | 0.240968673 |
| 60S ribosomal protein L9 (Fragment)                                    | RPL9    |    | 5  | 20.8  | 0.240820666 |
| Spectrin beta chain, non-erythrocytic 1                                | SPTBN1  | 14 | 66 | 274.4 | 0.240490866 |
| Neurabin-2                                                             | PPP1R9B | 6  | 21 | 89.1  | 0.235590544 |
| Ribosomal protein S2                                                   | rps2    |    | 6  | 25.6  | 0.234477667 |
| SmB /B' autoimmune antigene (Fragment)                                 |         | 1  | 5  | 22.0  | 0.227492864 |

|                                                                                                       |        |    |    |       |             |
|-------------------------------------------------------------------------------------------------------|--------|----|----|-------|-------------|
| 40S ribosomal protein S7                                                                              | RPS7   |    | 5  | 22.1  | 0.226108689 |
| 40S ribosomal protein S20                                                                             | RPS20  |    | 3  | 13.4  | 0.224478495 |
| Epithelial protein lost in neoplasm beta variant (Fragment)                                           |        |    | 19 | 85.2  | 0.223001047 |
| CROP protein (Fragment)                                                                               | CROP   |    | 6  | 27.0  | 0.222232327 |
| cDNA FLJ76817, highly similar to Homo sapiens non-POU domain containing, octamer-binding (NONO), mRNA | NONO   | 6  | 12 | 54.3  | 0.221184422 |
| Poly(U)-binding-splicing factor PUF60 (Fragment)                                                      | PUF60  | 10 | 12 | 54.6  | 0.219812318 |
| Paraspeckle component 1, isoform CRA_b                                                                | PSPC1  | 1  | 10 | 45.5  | 0.219576142 |
| Elongation factor 1-alpha 1                                                                           | EEF1A1 | 3  | 11 | 50.1  | 0.219520958 |
| Probable ATP-dependent RNA helicase DDX17                                                             | DDX17  | 7  | 17 | 80.2  | 0.211959332 |
| RPL27/NME2 fusion protein (Fragment)                                                                  | RPL27  |    | 3  | 14.2  | 0.210556573 |
| Caspase-6                                                                                             | CASP6  |    | 7  | 33.3  | 0.210282839 |
| 40S ribosomal protein S16                                                                             | RPS16  |    | 3  | 14.4  | 0.208189356 |
| cDNA FLJ54552, highly similar to Heterogeneous nuclear ribonucleoprotein K                            |        | 1  | 10 | 48.5  | 0.206269821 |
| ATP-dependent RNA helicase A                                                                          | DHX9   | 6  | 29 | 140.9 | 0.205864855 |
| Splicing factor U2AF 65 kDa subunit                                                                   | U2AF2  | 4  | 11 | 53.5  | 0.205733633 |
| Capping protein (Actin filament) muscle Z-line, beta, isoform CRA_a                                   | CAPZB  |    | 6  | 29.3  | 0.204940227 |
| 60S ribosomal protein L7                                                                              | RPL7   | 1  | 5  | 24.4  | 0.204772108 |
| 60S acidic ribosomal protein P0                                                                       |        | 1  | 7  | 34.2  | 0.2045718   |

|                                                                                       |         |    |    |       |             |
|---------------------------------------------------------------------------------------|---------|----|----|-------|-------------|
| 40S ribosomal protein SA (Fragment)                                                   | RPSA    | 1  | 6  | 29.4  | 0.20417918  |
| SFPQ protein (Fragment)                                                               | SFPQ    | 9  | 14 | 68.6  | 0.204117582 |
| 40S ribosomal protein S5                                                              | RPS5    |    | 3  | 14.8  | 0.203338374 |
| CSDA protein variant (Fragment)                                                       |         |    | 3  | 14.8  | 0.203010649 |
| ATP-dependent RNA helicase DDX5 (Fragment)                                            | DDX5    | 5  | 14 | 69.1  | 0.20267025  |
| 60S ribosomal protein L7a                                                             | RPL7A   |    | 6  | 30.0  | 0.20015328  |
| Heterogeneous nuclear ribonucleoproteins C1/C2                                        | HNRNPC  | 1  | 5  | 25.2  | 0.198089918 |
| X-ray repair complementing defective repair in Chinese hamster cells 4, isoform CRA_a | XRCC4   |    | 7  | 35.3  | 0.198021432 |
| Unconventional myosin-Ib                                                              | MYO1B   | 1  | 25 | 128.4 | 0.1947041   |
| Tight junction protein ZO-1                                                           | TJP1    | 2  | 38 | 195.3 | 0.194532633 |
| Gelsolin                                                                              | GSN     | 1  | 16 | 82.5  | 0.19399976  |
| Ig heavy chain variable region (Fragment)                                             | IgH     |    | 2  | 10.4  | 0.191990899 |
| Serine/arginine-rich-splicing factor 10                                               | SRSF10  |    | 4  | 20.9  | 0.1913833   |
| RNA-binding protein 25                                                                | RBM25   | 13 | 19 | 100.1 | 0.189763896 |
| Interleukin enhancer-binding factor 3                                                 | ILF3    | 4  | 18 | 95.3  | 0.188918707 |
| VH6DJ protein (Fragment)                                                              | VH6DJ   |    | 2  | 10.6  | 0.188410157 |
| Heterogeneous nuclear ribonucleoprotein Q                                             | SYNCRIP | 2  | 13 | 69.6  | 0.18689009  |
| LUC7-like ( <i>S. cerevisiae</i> ), isoform CRA_f                                     | LUC7L   | 1  | 6  | 32.4  | 0.185025742 |
| Rheumatoid factor RF-IP24 (Fragment)                                                  |         |    | 2  | 10.8  | 0.184597735 |
| cDNA FLJ78586, highly similar to Homo sapiens VAMP (vesicle-                          | VAPA    |    | 5  | 27.3  | 0.18315036  |

|                                                                                                                                                    |         |   |    |       |             |
|----------------------------------------------------------------------------------------------------------------------------------------------------|---------|---|----|-------|-------------|
| associated membrane protein)-associated protein A, 33kDa (VAPA), mRNA                                                                              |         |   |    |       |             |
| Heterogeneous nuclear ribonucleoprotein H                                                                                                          | HNRNPH1 | 4 | 9  | 49.2  | 0.182932737 |
| cDNA FLJ75422, highly similar to Homo sapiens capping protein (actin filament) muscle Z-line, alpha 1, mRNA                                        |         |   | 6  | 32.9  | 0.182435623 |
| Tubulin alpha-4A chain                                                                                                                             | TUBA4A  | 5 | 9  | 49.9  | 0.180388298 |
| 40S ribosomal protein S13                                                                                                                          | RPS13   |   | 3  | 16.7  | 0.179401623 |
| Actin-related protein 2                                                                                                                            | ACTR2   | 1 | 8  | 44.7  | 0.178841944 |
| Cofilin 1 (Non-muscle), isoform CRA_a                                                                                                              | CFL1    | 1 | 3  | 16.8  | 0.178562724 |
| 60S ribosomal protein L8                                                                                                                           | RPL8    |   | 5  | 28.0  | 0.178524947 |
| Elongation factor 1-alpha 2                                                                                                                        | EEF1A2  | 3 | 9  | 50.4  | 0.178435797 |
| Heterogeneous nuclear ribonucleoprotein A3                                                                                                         | HNRNPA3 | 1 | 7  | 39.6  | 0.176899077 |
| Actin-related protein 2/3 complex subunit 5                                                                                                        |         |   | 3  | 17.0  | 0.176878551 |
| cDNA FLJ77404, highly similar to Homo sapiens small nuclear ribonucleoprotein 70kDa polypeptide (RNP antigen) (SNRP70), transcript variant 1, mRNA | SNRP70  | 1 | 9  | 51.5  | 0.17487652  |
| cDNA FLJ34725 fis, clone MESAN2005958, highly similar to RNA-binding protein Luc7-like 2                                                           |         | 2 | 7  | 40.5  | 0.172981496 |
| Polyadenylate-binding protein                                                                                                                      | PABPC1  | 1 | 10 | 58.5  | 0.17094355  |
| cDNA FLJ75556, highly similar to Homo sapiens ribosomal protein L14, mRNA                                                                          |         |   | 4  | 23.6  | 0.169268361 |
| Cingulin                                                                                                                                           | CGN     |   | 23 | 136.3 | 0.168740283 |



|                                                                                                               |          |    |    |       |             |
|---------------------------------------------------------------------------------------------------------------|----------|----|----|-------|-------------|
| U5 small nuclear ribonucleoprotein 200 kDa helicase                                                           | SNRNP200 | 13 | 41 | 244.4 | 0.167790296 |
| cDNA FLJ44500 fis, clone UTERU3000828, highly similar to 116 kDa U5 small nuclear ribonucleoprotein component |          | 10 | 18 | 108.1 | 0.16644825  |
| rRNA 2'-O-methyltransferase fibrillar (Fragment)                                                              | FBL      |    | 3  | 18.2  | 0.164950393 |
| rRNA 2'-O-methyltransferase fibrillar (Fragment)                                                              | FBL      |    | 4  | 24.5  | 0.16307328  |
| Myosin IC, isoform CRA_a                                                                                      | MYO1C    |    | 16 | 98.9  | 0.161825114 |
| cDNA, FLJ93681, highly similar to Homo sapiens small nuclear ribonucleoprotein polypeptide A (SNRPA), mRNA    | SNRPA    | 2  | 5  | 31.3  | 0.159809729 |
| Heterogeneous nuclear ribonucleoprotein R                                                                     | HNRNPR   | 1  | 11 | 70.9  | 0.155149734 |
| Aprataxin (Fragment)                                                                                          | APTX     |    | 5  | 32.6  | 0.153318099 |
| Actin-related protein 2/3 complex subunit 4                                                                   | ARPC4    |    | 2  | 13.0  | 0.153267987 |
| cDNA FLJ53573, highly similar to Myosin Ic                                                                    |          |    | 18 | 119.0 | 0.151282897 |
| SH3-containing Grb-2-like 1 protein                                                                           |          |    | 6  | 39.8  | 0.150696538 |
| CSNK1A1 protein (Fragment)                                                                                    | CSNK1A1  |    | 4  | 26.7  | 0.149897108 |
| Splicing factor 3A subunit 1                                                                                  | SF3A1    | 9  | 13 | 88.8  | 0.146346106 |
| 40S ribosomal protein S25                                                                                     | RPS25    | 2  | 2  | 13.7  | 0.145627187 |
| Cleavage and polyadenylation-specificity factor subunit 7 (Fragment)                                          | CPSF7    |    | 6  | 41.2  | 0.145487403 |
| ATP-dependent RNA helicase DDX3X                                                                              | DDX3X    | 1  | 10 | 69.0  | 0.144917218 |
| cDNA FLJ44468 fis, clone UTERU2026025,                                                                        |          | 1  | 2  | 13.8  | 0.144872464 |

|                                                                          |         |    |    |       |             |
|--------------------------------------------------------------------------|---------|----|----|-------|-------------|
| moderately similar to<br>SPLICING FACTOR,<br>ARGININE/SERINE-<br>RICH 2  |         |    |    |       |             |
| Casein kinase I isoform<br>alpha                                         | CSNK1A1 |    | 4  | 27.7  | 0.144284779 |
| Small nuclear<br>ribonucleoprotein Sm<br>D3                              | SNRPD3  | 1  | 2  | 13.9  | 0.143809316 |
| Drebrin                                                                  | DBN1    |    | 10 | 71.4  | 0.140084585 |
| 60S ribosomal protein<br>L24                                             | RPL24   |    | 2  | 14.4  | 0.13927748  |
| Pre-mRNA-processing-<br>splicing factor 8                                | PRPF8   | 7  | 38 | 273.4 | 0.138976983 |
| ELAV-like protein 1                                                      | ELAVL1  |    | 5  | 36.1  | 0.138622611 |
| Nucleolin, isoform<br>CRA_c                                              | NCL     |    | 8  | 58.5  | 0.136706984 |
| RNA-binding protein 39<br>(Fragment)                                     | RBM39   | 2  | 5  | 36.6  | 0.136606512 |
| RAB1B protein                                                            | RAB1B   |    | 3  | 22.2  | 0.135231133 |
| 60S ribosomal protein<br>L17 (Fragment)                                  | RPL17   |    | 2  | 14.9  | 0.134364961 |
| Suppressor of Ty 5<br>homolog ( <i>S. cerevisiae</i> ),<br>isoform CRA_a | SUPT5H  |    | 14 | 104.3 | 0.134205627 |
| DNA damage-binding<br>protein 1                                          | DDB1    | 12 | 17 | 126.9 | 0.133977129 |
| 40S ribosomal protein<br>S3a                                             | RPS3A   |    | 4  | 29.9  | 0.133664193 |
| 40S ribosomal protein<br>S9                                              | RPS9    |    | 3  | 22.6  | 0.132875315 |
| Heterogeneous nuclear<br>ribonucleoprotein F                             | HNRNPF  | 4  | 6  | 45.6  | 0.131455398 |
| DNA topoisomerase 2-<br>beta                                             | TOP2B   | 1  | 24 | 183.2 | 0.131038371 |
| Pre-mRNA-processing<br>factor 6                                          | PRPF6   | 5  | 14 | 106.9 | 0.131015237 |
| Filamin A                                                                | FLNA    | 4  | 36 | 277.3 | 0.129808139 |
| Heterogeneous nuclear<br>ribonucleoprotein U-like<br>1, isoform CRA_a    | HNRPUL1 | 6  | 11 | 84.7  | 0.129807283 |
| Heterogeneous nuclear<br>ribonucleoprotein A0                            | HNRNPA0 |    | 4  | 30.8  | 0.129778331 |
| E3 ubiquitin-protein<br>ligase TRIM21                                    | TRIM21  | 6  | 7  | 54.1  | 0.129306064 |

|                                                                                                      |         |    |    |       |             |
|------------------------------------------------------------------------------------------------------|---------|----|----|-------|-------------|
| Heterogeneous nuclear ribonucleoprotein M                                                            | HNRNPM  | 3  | 10 | 77.5  | 0.129001598 |
| 40S ribosomal protein S17                                                                            | RPS17   |    | 2  | 15.5  | 0.128696894 |
| 60S ribosomal protein L18                                                                            | RPL18   |    | 2  | 15.6  | 0.127961167 |
| cDNA, FLJ94417, highly similar to Homo sapiens WD repeat domain 57 (U5 snRNP specific) (WDR57), mRNA | WDR57   | 1  | 5  | 39.2  | 0.127415376 |
| 60S ribosomal protein L4                                                                             | RPL4    |    | 6  | 47.7  | 0.12587211  |
| Arginine/serine-rich splicing factor 6 variant (Fragment)                                            | SRSF6   | 2  | 4  | 31.8  | 0.125603886 |
| Heterogeneous nuclear ribonucleoprotein D0 (Fragment)                                                | HNRNPD  | 1  | 3  | 23.9  | 0.125490575 |
| 40S ribosomal protein S14 (Fragment)                                                                 | RPS14   |    | 2  | 16.1  | 0.12384323  |
| Splicing factor 3B subunit 1                                                                         | SF3B1   | 12 | 18 | 145.7 | 0.123509226 |
| Transformer-2 protein homolog alpha                                                                  | TRA2A   |    | 4  | 32.7  | 0.12243999  |
| U4/U6.U5 tri-snRNP-associated protein 2                                                              | USP39   | 1  | 8  | 65.3  | 0.122437051 |
| Archaeometzincins-2, isoform CRA_d                                                                   | AMZ2    | 3  | 5  | 41.2  | 0.1212475   |
| Scaffold attachment factor B2                                                                        | SAFB2   | 2  | 13 | 107.4 | 0.121033721 |
| 60S ribosomal protein L10a                                                                           | RPL10A  |    | 3  | 24.8  | 0.120892008 |
| Elongation factor 1-gamma                                                                            | EEF1G   | 1  | 6  | 50.1  | 0.119791217 |
| Plakophilin-3 (Fragment)                                                                             | PKP3    |    | 2  | 16.8  | 0.119399061 |
| cDNA FLJ46571 fis, clone THYMU3041428, highly similar to Probable ATP-dependent RNA helicase DDX23   | ddx23   | 3  | 11 | 93.2  | 0.118055309 |
| Protein FAM207A                                                                                      | FAM207A |    | 3  | 25.4  | 0.117920779 |

|                                                                                    |         |   |    |       |             |
|------------------------------------------------------------------------------------|---------|---|----|-------|-------------|
| RuvB-like 2                                                                        | RUVBL2  |   | 6  | 51.1  | 0.117360431 |
| Parafibromin                                                                       | CDC73   | 5 | 7  | 60.5  | 0.115627779 |
| cDNA FLJ54020, highly similar to Heterogeneous nuclear ribonucleoprotein U         |         | 3 | 10 | 86.8  | 0.115198935 |
| U1 small nuclear ribonucleoprotein C                                               | SNRPC   |   | 2  | 17.4  | 0.115066598 |
| Cleavage and polyadenylation-specificity factor subunit 6                          | CPSF6   | 3 | 6  | 52.2  | 0.11485938  |
| cDNA FLJ57937, highly similar to DNA-directed RNA polymerase II 33 kDa polypeptide |         |   | 2  | 17.5  | 0.114489804 |
| 40S ribosomal protein S18                                                          | RPS18   |   | 2  | 17.7  | 0.112944189 |
| THO complex subunit 4                                                              | ALYREF  | 1 | 3  | 26.9  | 0.111641942 |
| Splicing factor 45                                                                 | RBM17   |   | 5  | 44.9  | 0.111274516 |
| 60S ribosomal protein L5 (Fragment)                                                | RPL5    |   | 3  | 27.0  | 0.11099722  |
| SH3KBP1 binding protein 1, isoform CRA_c                                           | SHKBP1  | 1 | 8  | 73.7  | 0.108604914 |
| Eukaryotic initiation factor 4A-III                                                | EIF4A3  | 1 | 5  | 46.8  | 0.106743672 |
| Poly(rC)-binding protein 1                                                         | PCBP1   | 2 | 4  | 37.5  | 0.10674083  |
| Testicular tissue protein Li 128                                                   |         |   | 3  | 28.4  | 0.105698155 |
| Ladinin-1                                                                          | LAD1    |   | 6  | 57.1  | 0.105084615 |
| Transcription elongation regulator 1                                               | TCERG1  |   | 13 | 123.8 | 0.104988333 |
| Elongation factor 1-delta (Fragment)                                               | EEF1D   |   | 3  | 28.8  | 0.104153648 |
| KH domain containing, RNA binding, signal transduction associated 1, isoform CRA_b | KHDRBS1 |   | 4  | 38.7  | 0.103470541 |
| Nucleolar RNA helicase 2                                                           | DDX21   |   | 9  | 87.3  | 0.103104139 |
| 60 kDa U4/U6 snRNP-specific spliceosomal protein                                   | PRPF4   | 2 | 6  | 58.3  | 0.102943601 |

|                                                                                                        |           |   |    |       |             |
|--------------------------------------------------------------------------------------------------------|-----------|---|----|-------|-------------|
| cDNA FLJ40872 fis, clone TUTER2000283, highly similar to Homo sapiens transformer-2-beta (SFRS10) gene |           |   | 3  | 29.2  | 0.102798808 |
| DNA-dependent protein kinase catalytic subunit                                                         | PRKDC     | 2 | 48 | 468.8 | 0.102391714 |
| Spliceosome RNA helicase DDX39B                                                                        | DDX39B    |   | 5  | 49.0  | 0.1021243   |
| Heterogeneous nuclear ribonucleoprotein H2                                                             | HNRNPH2   | 2 | 5  | 49.2  | 0.101559364 |
| Pre-mRNA-splicing regulator WTAP                                                                       | WTAP      |   | 2  | 19.9  | 0.100608641 |
| HCG32740, isoform CRA_b                                                                                | hCG_32740 |   | 12 | 119.4 | 0.100515979 |
| cDNA FLJ59523, highly similar to Scaffold attachment factor B                                          |           | 2 | 9  | 91.0  | 0.098868087 |
| cDNA FLJ61545, highly similar to Coatamer subunit beta                                                 |           |   | 3  | 30.5  | 0.098331373 |
| Actin-related protein 2/3 complex subunit 3                                                            |           |   | 2  | 20.5  | 0.097526135 |
| Nuclear mitotic apparatus protein 1                                                                    | NUMA1     | 5 | 23 | 236.0 | 0.097449769 |
| WD repeat-containing protein 61                                                                        | WDR61     | 1 | 2  | 20.7  | 0.096475716 |
| Arf-GAP with GTPase, ANK repeat and PH domain-containing protein 3                                     | AGAP3     |   | 9  | 95.0  | 0.094751517 |
| Ran GTPase-activating protein 1                                                                        | RANGAP1   |   | 6  | 63.5  | 0.094484756 |
| Fusion (Involved in t(12;16) in malignant liposarcoma) isoform a variant (Fragment)                    |           | 2 | 3  | 32.0  | 0.093825381 |
| DNA-directed RNA polymerases I, II, and III subunit RPABC1                                             | POLR2E    |   | 2  | 21.4  | 0.093257034 |
| 40S ribosomal protein S8                                                                               | RPS8      | 1 | 2  | 21.9  | 0.09146614  |
| F-actin-capping protein subunit alpha-2                                                                | CAPZA2    |   | 3  | 32.9  | 0.091106185 |
| Pre-mRNA-processing factor 19                                                                          | PRPF19    | 1 | 5  | 55.1  | 0.090667838 |

|                                                                                                       |         |   |    |       |             |
|-------------------------------------------------------------------------------------------------------|---------|---|----|-------|-------------|
| Polypyrimidine tract binding protein 1, isoform CRA_b                                                 | PTBP1   |   | 5  | 56.5  | 0.088534204 |
| Actin filament-associated protein 1                                                                   | AFAP1   |   | 7  | 80.7  | 0.086768151 |
| cDNA, FLJ96225, highly similar to Homo sapiens heat shock 70kDa protein 1-like (HSPA1L), mRNA         |         | 5 | 6  | 70.3  | 0.085309343 |
| cDNA FLJ78246, highly similar to Homo sapiens splicing factor 3a, subunit 3, 60kDa (SF3A3), mRNA      | SF3A3   | 1 | 5  | 58.8  | 0.085100221 |
| FACT complex subunit SPT16                                                                            | SUPT16H | 6 | 10 | 119.8 | 0.083445689 |
| cDNA, FLJ94229, highly similar to Homo sapiens heterogeneous nuclear ribonucleoprotein L (HNRPL),mRNA | HNRPL   | 1 | 5  | 60.2  | 0.083041019 |
| Pre-mRNA-processing factor 40 homolog A                                                               | PRPF40A | 2 | 9  | 108.7 | 0.082768834 |
| Brain-specific angiogenesis inhibitor 1-associated protein 2                                          | BAIAP2  |   | 5  | 60.8  | 0.082196799 |
| cDNA FLJ53820, highly similar to U4/U6.U5 tri-snRNP-associated protein 1                              |         | 2 | 6  | 73.4  | 0.081749802 |
| E3 ubiquitin-protein ligase ZNF598                                                                    | ZNF598  |   | 8  | 98.6  | 0.081156312 |
| Elongation factor 1-beta                                                                              | EEF1B2  |   | 2  | 24.7  | 0.080813751 |
| CD2 antigen cytoplasmic tail-binding protein 2                                                        | CD2BP2  |   | 3  | 37.6  | 0.079737958 |
| cDNA FLJ55635, highly similar to pre-mRNA-splicing factorATP-dependent RNA helicase DHX15             | dhx15   | 4 | 7  | 89.5  | 0.078220549 |
| DNA topoisomerase 1                                                                                   | TOP1    | 3 | 7  | 90.7  | 0.07720397  |
| CDC2L2 protein (Fragment)                                                                             | CDC2L2  | 2 | 4  | 52.4  | 0.076374623 |

|                                                                                                |               |   |    |       |             |
|------------------------------------------------------------------------------------------------|---------------|---|----|-------|-------------|
| cDNA FLJ53422, highly similar to TATA-binding protein-associated factor 2N                     |               | 1 | 3  | 40.1  | 0.074898508 |
| Actin-related protein 2/3 complex subunit 1B                                                   | ARPC1B        |   | 3  | 40.9  | 0.073307662 |
| RNA-binding protein 14                                                                         | RBM14         |   | 5  | 69.4  | 0.071995372 |
| U2 small nuclear RNA auxillary factor 1 isoform a                                              | U2AF1         | 1 | 2  | 27.9  | 0.071799319 |
| cDNA FLJ57899, highly similar to Mitotic checkpoint protein BUB3                               |               |   | 2  | 28.2  | 0.070869513 |
| WD40 repeat-containing protein SMU1                                                            | SMU1          |   | 4  | 57.5  | 0.069556469 |
| TJP3 protein (Fragment)                                                                        | TJP3          |   | 7  | 101.1 | 0.069238226 |
| Coronin                                                                                        | CORO1B        |   | 2  | 28.9  | 0.069130632 |
| Receptor of-activated protein C kinase 1                                                       | RACK1         |   | 2  | 29.7  | 0.067268146 |
| Tight junction protein 2 (Zona occludens 2), isoform CRA_a                                     | TJP2          |   | 9  | 133.9 | 0.067219209 |
| Serine protease HTRA2, mitochondrial (Fragment)                                                | HTRA2         |   | 3  | 45.1  | 0.066541029 |
| Taperin                                                                                        | TPRN          | 1 | 5  | 75.5  | 0.066216678 |
| Heterogeneous nuclear ribonucleoprotein A/B                                                    | HNRNPAB       | 1 | 2  | 30.3  | 0.066041513 |
| DNA-directed RNA polymerase subunit beta                                                       | POLR2B        |   | 8  | 121.3 | 0.065954967 |
| FYVE and coiled-coil domain-containing protein 1                                               | FYCO1         |   | 11 | 166.9 | 0.065915872 |
| cDNA FLJ57562, highly similar to Cleavage and polyadenylation specificityfactor 73 kDa subunit |               |   | 3  | 45.9  | 0.065360733 |
| DNA ligase                                                                                     | LIG4          |   | 6  | 96.2  | 0.062400478 |
| Putative oxidoreductase protein                                                                | BQ8482_110351 |   | 2  | 32.7  | 0.061239314 |
| Nuclear receptor subfamily 2 group C member 2                                                  | NR2C2         |   | 4  | 65.4  | 0.061187263 |

|                                                                             |                |   |    |       |             |
|-----------------------------------------------------------------------------|----------------|---|----|-------|-------------|
| Pre-mRNA 3'-end-processing factor FIP1                                      | FIP1L1         | 1 | 4  | 66.5  | 0.060162553 |
| Albumin (Fragment)                                                          |                | 7 | 4  | 66.5  | 0.060161246 |
| Twinfilin-1 (Fragment)                                                      | TWF1           |   | 2  | 33.4  | 0.059903548 |
| RuvB-like helicase (Fragment)                                               | RUVBL1         |   | 3  | 50.2  | 0.059779676 |
| Cleavage and polyadenylation specific factor 1, 160kDa, isoform CRA_a       | CPSF1          |   | 9  | 151.9 | 0.059253532 |
| U2 snRNP-associated SURP motif-containing protein                           | U2SURP         | 1 | 7  | 118.2 | 0.059212336 |
| RNA-binding protein 15                                                      | RBM15          |   | 6  | 102.1 | 0.058781279 |
| cDNA FLJ38393 fis, clone FEBRA2007212                                       |                |   | 6  | 102.9 | 0.058328432 |
| Protein FAM98A                                                              | FAM98A         | 1 | 2  | 34.4  | 0.058124138 |
| Uncharacterized protein DKFZp686G11190                                      | DKFZp686G11190 | 2 | 3  | 52.0  | 0.057681245 |
| cDNA FLJ60629, highly similar to Replication factor C subunit 3             |                |   | 2  | 34.8  | 0.057454521 |
| Transcription factor ETV6                                                   | ETV6           |   | 3  | 53.0  | 0.056639451 |
| SIPA1L1 protein                                                             | SIPA1L1        | 1 | 11 | 199.8 | 0.055043148 |
| Leucine zipper putative tumor suppressor 2                                  | LZTS2          |   | 4  | 72.7  | 0.055009357 |
| tRNA-splicing ligase RtcB homolog                                           | RTCB           |   | 3  | 55.2  | 0.05437259  |
| GTPBP4 protein (Fragment)                                                   | GTPBP4         |   | 4  | 73.7  | 0.054301465 |
| Heterogeneous nuclear ribonucleoprotein H3                                  | HNRNPH3        |   | 2  | 36.9  | 0.054196013 |
| Coatomer subunit delta                                                      | ARCN1          |   | 3  | 57.2  | 0.052471286 |
| Zinc finger protein 185                                                     | ZNF185         |   | 3  | 58.3  | 0.051490911 |
| Cleavage and polyadenylation specificity factor subunit 2                   |                | 1 | 4  | 78.1  | 0.051188576 |
| cDNA FLJ51017, highly similar to ATP-dependent RNA helicase DDX1 (Fragment) |                |   | 3  | 59.2  | 0.050710704 |
| Coatomer subunit alpha                                                      | COPA           |   | 7  | 138.3 | 0.050630021 |



|                                                                                                                               |          |   |    |       |             |
|-------------------------------------------------------------------------------------------------------------------------------|----------|---|----|-------|-------------|
| Serum paraoxonase/arylesterase 1                                                                                              | PON1     |   | 2  | 39.7  | 0.05036993  |
| cDNA FLJ61347, highly similar to General transcription factor II-I                                                            |          |   | 3  | 59.6  | 0.050349593 |
| cDNA FLJ35376 fis, clone SKMUS2004044, highly similar to Homo sapiens ribosomal protein L3 (RPL3), transcript variant 2, mRNA |          |   | 2  | 40.1  | 0.049850878 |
| cDNA FLJ78217                                                                                                                 |          |   | 2  | 40.3  | 0.049678431 |
| Heterogeneous nuclear ribonucleoprotein U-like protein 2                                                                      | HNRNPUL2 |   | 4  | 85.1  | 0.047029957 |
| cDNA, FLJ94450, highly similar to Homo sapiens cyclin-dependent kinase 9 (CDC2-related kinase) (CDK9), mRNA                   |          | 1 | 2  | 42.7  | 0.046816303 |
| Disks large homolog 5                                                                                                         | DLG5     |   | 10 | 213.7 | 0.046786864 |
| Filamin-B                                                                                                                     | FLNB     |   | 13 | 278.0 | 0.04676426  |
| Coatomer subunit beta                                                                                                         | COPB1    |   | 5  | 107.1 | 0.046696784 |
| cDNA FLJ56491, highly similar to DNA-repair protein XRCC1                                                                     |          |   | 2  | 43.2  | 0.046302457 |
| cDNA FLJ52785, highly similar to Protein cereblon                                                                             |          | 1 | 2  | 43.3  | 0.046226872 |
| Thyroid hormone receptor-associated protein 3                                                                                 | THRAP3   | 1 | 5  | 108.6 | 0.046040083 |
| cDNA FLJ55260, highly similar to Exosome complex exonuclease RRP45                                                            |          |   | 2  | 43.5  | 0.045941091 |
| Nucleolar transcription factor 1                                                                                              | UBTF     | 2 | 4  | 87.4  | 0.045776956 |
| WD repeat-containing protein 1                                                                                                | WDR1     |   | 3  | 66.2  | 0.04535019  |
| cDNA FLJ39996 fis, clone STOMA2002166,                                                                                        |          | 1 | 2  | 44.5  | 0.04498912  |

|                                                                                                                             |         |  |   |       |             |
|-----------------------------------------------------------------------------------------------------------------------------|---------|--|---|-------|-------------|
| highly similar to Splicing factor 3B subunit 4                                                                              |         |  |   |       |             |
| cDNA FLJ51295, highly similar to Cell division cycle 5-like protein                                                         |         |  | 4 | 89.2  | 0.04485754  |
| DnaJ homolog subfamily A member 1                                                                                           | DNAJA1  |  | 2 | 44.8  | 0.044603575 |
| Protein FAM83G                                                                                                              | FAM83G  |  | 4 | 90.8  | 0.044063187 |
| Actin-binding LIM protein 1                                                                                                 | ABLIM1  |  | 2 | 46.0  | 0.043438547 |
| Caprin-1                                                                                                                    | CAPRIN1 |  | 3 | 70.3  | 0.042668179 |
| Histone-binding protein RBBP7                                                                                               | RBBP7   |  | 2 | 46.9  | 0.042635933 |
| Membrane-associated guanylate kinase, WW and PDZ domain-containing protein 1                                                | MAGI1   |  | 7 | 164.5 | 0.042558154 |
| Matrin-3                                                                                                                    | MATR3   |  | 4 | 94.6  | 0.042299036 |
| Trans-acting T-cell-specific transcription factor GATA-3                                                                    | GATA3   |  | 2 | 47.9  | 0.041766434 |
| cDNA FLJ50575, highly similar to U4/U6 small nuclear ribonucleoprotein Prp3                                                 |         |  | 3 | 72.1  | 0.041632409 |
| cDNA FLJ60738, highly similar to RNA polymerase-associated protein LEO1                                                     |         |  | 3 | 72.7  | 0.041242664 |
| SAFB-like transcription modulator (Fragment)                                                                                | SLTM    |  | 2 | 48.8  | 0.040967842 |
| PPP1R9A protein                                                                                                             | PPP1R9A |  | 5 | 122.3 | 0.040866901 |
| 5'-3' exoribonuclease                                                                                                       |         |  | 4 | 99.9  | 0.04004482  |
| Splicing factor, arginine/serine-rich 15                                                                                    | SFRS15  |  | 5 | 125.7 | 0.039789217 |
| Protein unc-45 homolog A                                                                                                    | UNC45A  |  | 4 | 103.0 | 0.038830618 |
| cDNA, FLJ94773, highly similar to Homo sapiens splicing factor, arginine/serine-rich 2, interacting protein (SFRS2IP), mRNA |         |  | 5 | 128.8 | 0.038805652 |

|                                                                                                                           |        |   |   |       |             |
|---------------------------------------------------------------------------------------------------------------------------|--------|---|---|-------|-------------|
| Anti-RhD monoclonal T125 gamma1 heavy chain                                                                               |        | 2 | 2 | 52.3  | 0.038219512 |
| Oxysterol-binding protein (Fragment)                                                                                      | OSBPL8 |   | 3 | 79.0  | 0.037972809 |
| Bcl-2-associated transcription factor 1                                                                                   | BCLAF1 |   | 2 | 52.9  | 0.037817443 |
| cDNA FLJ35987 fis, clone TEST12014269, highly similar to D-3-phosphoglycerate dehydrogenase                               |        |   | 2 | 53.0  | 0.037750509 |
| cDNA FLJ61696, highly similar to Double-stranded RNA-specific adenosine deaminase                                         |        |   | 4 | 106.9 | 0.037401084 |
| cDNA, FLJ79396, highly similar to Phenylalanyl-tRNA synthetase beta chain                                                 |        |   | 2 | 54.8  | 0.03650991  |
| Supervillin                                                                                                               | SVIL   |   | 9 | 247.6 | 0.036350035 |
| DNA ligase 3                                                                                                              | LIG3   |   | 4 | 112.8 | 0.035450054 |
| cDNA, FLJ94919, highly similar to Homo sapiens protein phosphatase 1, regulatory (inhibitor) subunit 12A (PPP1R12A), mRNA |        |   | 4 | 115.3 | 0.034704342 |
| Probable ATP-dependent RNA helicase DDX46                                                                                 | DDX46  | 1 | 4 | 117.3 | 0.034103647 |
| BTB/POZ domain-containing protein KCTD3                                                                                   | KCTD3  |   | 3 | 88.9  | 0.033734893 |
| NEDD4-binding protein 3                                                                                                   | N4BP3  |   | 2 | 60.4  | 0.033094651 |
| Nuclear cap-binding protein subunit 1                                                                                     | NCBP1  | 1 | 3 | 91.8  | 0.032686674 |
| Myosin-9                                                                                                                  | MYH9   |   | 7 | 226.4 | 0.030919875 |
| cDNA, FLJ92684, highly similar to Homo sapiens IK cytokine, down-regulator of HLA II (IK), mRNA                           |        |   | 2 | 65.6  | 0.03049815  |

|                                                                                               |             |   |   |       |             |
|-----------------------------------------------------------------------------------------------|-------------|---|---|-------|-------------|
| HCG1994636, isoform CRA_b                                                                     | hCG_1994636 |   | 3 | 101.5 | 0.029549169 |
| Calcium homeostasis endoplasmic reticulum protein                                             | CHERP       |   | 3 | 103.6 | 0.028947157 |
| Clathrin heavy chain 1                                                                        | CLTC        |   | 2 | 70.6  | 0.028325526 |
| Zinc finger CCCH domain-containing protein 18                                                 | ZC3H18      |   | 3 | 106.3 | 0.028217898 |
| Spermatid perinuclear RNA binding protein isoform 2 (Fragment)                                | STRBP       |   | 2 | 72.1  | 0.02774456  |
| Endoplasmic reticulum chaperone BiP                                                           | HSPA5       | 5 | 2 | 72.3  | 0.027666941 |
| Complement C4-A                                                                               | C4A         |   | 5 | 187.6 | 0.026645933 |
| AKAP8 protein OS                                                                              | AKAP8       | 1 | 2 | 76.1  | 0.026274618 |
| KIAA0324 (Fragment)                                                                           | KIAA0324    |   | 5 | 191.2 | 0.026151589 |
| RNA cytidine acetyltransferase                                                                | NAT10       |   | 3 | 115.7 | 0.025938856 |
| YLP motif-containing protein 1                                                                | YLPM1       |   | 6 | 241.5 | 0.024845258 |
| cDNA FLJ75071, highly similar to Homo sapiens pinin, desmosome associated protein (PNN), mRNA |             | 1 | 2 | 81.5  | 0.024542002 |
| FN1 protein                                                                                   | FN1         |   | 6 | 246.5 | 0.024336492 |
| Desmoplakin                                                                                   | DSP         | 6 | 8 | 331.6 | 0.024127728 |
| DNA-directed RNA polymerase II subunit RPB1                                                   | POLR2A      |   | 5 | 217.0 | 0.023037327 |
| Pleckstrin homology domain-containing family G member 3                                       | PLEKHG3     |   | 3 | 134.3 | 0.022333183 |
| La-related protein 1 (Fragment)                                                               | LARP1       |   | 2 | 90.8  | 0.022034482 |
| RNA-binding protein 5                                                                         | RBM5        |   | 2 | 92.1  | 0.021716242 |
| Kinesin-like protein                                                                          | KIF23       |   | 2 | 92.6  | 0.021592517 |
| USP6 N-terminal-like protein                                                                  | USP6NL      |   | 2 | 94.0  | 0.02126627  |
| RNA binding motif protein 10 isoform 1 (Fragment)                                             | RBM10       |   | 2 | 94.3  | 0.021206161 |

|                                                                                                    |         |  |   |        |             |
|----------------------------------------------------------------------------------------------------|---------|--|---|--------|-------------|
| cDNA FLJ45597 fis, clone BRTHA3018409, weakly similar to Mus musculus synaptotagmin-like 4 (Sytl4) |         |  | 2 | 95.2   | 0.021012501 |
| Cyclin-dependent kinase 13 (Fragment)                                                              | CDK13   |  | 3 | 143.8  | 0.020860357 |
| pre-mRNA 3' end processing protein WDR33                                                           | WDR33   |  | 3 | 145.8  | 0.020576231 |
| Coatomer subunit gamma-2                                                                           | COPG2   |  | 2 | 97.6   | 0.020500292 |
| cDNA FLJ54557, highly similar to helicase MOV-10                                                   |         |  | 2 | 106.5  | 0.018787867 |
| Signal-induced proliferation-associated 1 like 3                                                   | SIPA1L3 |  | 3 | 194.5  | 0.015423881 |
| IQ motif containing GTPase activating protein 1                                                    | IQGAP1  |  | 2 | 189.2  | 0.010572957 |
| Unconventional myosin-Vc                                                                           | MYO5C   |  | 2 | 202.7  | 0.009867664 |
| Titin, isoform CRA_b                                                                               | TTN     |  | 2 | 2991.2 | 0.000668631 |

**Supplementary Table S6: Proteins identified by Mass Spec in ALYREF-IP**

| <b>Description</b>                                                     | <b>Symbol</b> | <b># Peptides IgG(IP)</b> | <b># Peptides ALYREF(IP)</b> | <b>MW [kDa]</b> | <b>peptides ALYREF/MW</b> |
|------------------------------------------------------------------------|---------------|---------------------------|------------------------------|-----------------|---------------------------|
| RPS4X protein (Fragment)                                               | RPS4X         |                           | 12                           | 27.2            | 0.440484649               |
| Histone H4                                                             | HIST1H4A      |                           | 5                            | 11.4            | 0.440126033               |
| Heterogeneous nuclear ribonucleoproteins A2/B1                         | HNRNPA2B1     | 5                         | 16                           | 37.4            | 0.427730536               |
| Heterogeneous nuclear ribonucleoprotein A1                             | HNRNPA1       | 1                         | 12                           | 33.1            | 0.362156465               |
| Heat shock protein beta-1                                              | HSPB1         | 5                         | 8                            | 22.8            | 0.351362721               |
| Heterogeneous nuclear ribonucleoproteins C1/C2                         | HNRNPC        | 1                         | 8                            | 25.2            | 0.316943868               |
| cDNA FLJ51660, highly similar to Interleukin enhancer-binding factor 2 | ILF2          | 5                         | 12                           | 38.9            | 0.308593123               |
| Heterogeneous nuclear ribonucleoprotein A3                             | HNRNPA3       | 1                         | 11                           | 39.6            | 0.277984264               |
| Heterogeneous nuclear ribonucleoprotein Q                              | SYNCRIP       | 2                         | 18                           | 69.6            | 0.258770894               |
| U2 small nuclear ribonucleoprotein A'                                  | SNRPA1        | 5                         | 7                            | 28.4            | 0.246495062               |
| Tubulin beta chain                                                     | TUBB          | 9                         | 12                           | 49.6            | 0.24174553                |
| Actin, alpha cardiac muscle 1                                          | ACTC1         | 9                         | 10                           | 42.0            | 0.238141264               |
| Transferrin receptor (P90, CD71), isoform CRA_c                        | TFRC          |                           | 18                           | 75.9            | 0.237102206               |
| THO complex subunit 4                                                  | ALYREF        | 1                         | 6                            | 26.9            | 0.223283883               |
| Interleukin enhancer-binding factor 3                                  | ILF3          | 4                         | 21                           | 95.3            | 0.220405158               |
| Histone H2A type 1-H                                                   | HIST1H2AH     |                           | 3                            | 13.9            | 0.215860989               |
| Histone H2B                                                            |               |                           | 3                            | 14.0            | 0.214475601               |
| Heterogeneous nuclear ribonucleoprotein R                              | HNRNPR        | 1                         | 15                           | 70.9            | 0.21156782                |
| Tubulin beta-4B chain                                                  | TUBB4B        | 8                         | 10                           | 49.8            | 0.200807228               |
| Ig heavy chain variable region (Fragment)                              | IgH           |                           | 2                            | 10.2            | 0.195945383               |

|                                                                                                                       |          |    |    |       |             |
|-----------------------------------------------------------------------------------------------------------------------|----------|----|----|-------|-------------|
| Histone H3                                                                                                            | H3F3B    | 1  | 2  | 10.3  | 0.193651553 |
| Rheumatoid factor RF-ET12 (Fragment)                                                                                  |          |    | 2  | 10.5  | 0.190075289 |
| cDNA FLJ54020, highly similar to Heterogeneous nuclear ribonucleoprotein U                                            |          | 3  | 16 | 86.8  | 0.184318297 |
| Ig heavy chain variable region (Fragment)                                                                             | IgH      |    | 2  | 11.0  | 0.182644907 |
| Serine/arginine-rich splicing factor 1                                                                                | SRSF1    | 2  | 5  | 27.7  | 0.180324334 |
| Elongation factor 1-alpha 1                                                                                           | EEF1A1   | 3  | 9  | 50.1  | 0.179608057 |
| IGHV3-72 protein (Fragment)                                                                                           | IGHV3-72 |    | 2  | 11.7  | 0.171401331 |
| Polyadenylate-binding protein                                                                                         | PABPC1   | 1  | 10 | 58.5  | 0.17094355  |
| Serine/threonine-protein kinase MRCK gamma                                                                            | CDC42BPG |    | 29 | 172.4 | 0.168260082 |
| Tubulin alpha-1C chain                                                                                                | TUBA1C   | 6  | 6  | 36.6  | 0.163810012 |
| Alpha-actinin-4                                                                                                       | ACTN4    | 16 | 17 | 104.8 | 0.162231576 |
| Heterogeneous nuclear ribonucleoprotein A0                                                                            | HNRNPA0  |    | 5  | 30.8  | 0.162222913 |
| Protein SET                                                                                                           | SET      | 1  | 5  | 31.1  | 0.160744503 |
| Tubulin alpha-4A chain                                                                                                | TUBA4A   | 5  | 8  | 49.9  | 0.160345154 |
| Immunoglobulin heavy variable 3-49                                                                                    | IGHV3-49 |    | 2  | 13.0  | 0.153285693 |
| cDNA, FLJ93125, highly similar to Homo sapiens cleavage and polyadenylation specific factor 5, 25 kDa(CPSF5), mRNA OS |          |    | 4  | 26.2  | 0.152679305 |
| Spermatid perinuclear RNA binding protein isoform 2 (Fragment)                                                        | STRBP    |    | 11 | 72.1  | 0.152595082 |
| Splicing factor U2AF 65 kDa subunit                                                                                   | U2AF2    | 4  | 8  | 53.5  | 0.14962446  |
| Poly(U)-binding-splicing factor PUF60 (Fragment)                                                                      | PUF60    | 10 | 8  | 54.6  | 0.146541545 |
| GCT-A1 heavy chain variable region (Fragment)                                                                         |          |    | 2  | 13.7  | 0.145891144 |

|                                                                                     |             |    |    |       |             |
|-------------------------------------------------------------------------------------|-------------|----|----|-------|-------------|
| RPS10-NUDT3<br>readthrough (Fragment)                                               | RPS10-NUDT3 |    | 2  | 14.3  | 0.14001102  |
| Apolipoprotein E<br>isoform 5 (Fragment)                                            | APOE        |    | 2  | 14.4  | 0.138779306 |
| SmB /B' autoimmune<br>antigene (Fragment)                                           |             | 1  | 3  | 22.0  | 0.136495718 |
| Junction plakoglobin,<br>isoform CRA_a                                              | JUP         |    | 11 | 81.7  | 0.134680501 |
| Serine/threonine-protein<br>phosphatase PP1-alpha<br>catalytic subunit              | PPP1CA      | 5  | 5  | 37.5  | 0.133376704 |
| Heterogeneous nuclear<br>ribonucleoprotein F                                        | HNRNPF      | 4  | 6  | 45.6  | 0.131455398 |
| ATP-dependent RNA<br>helicase DDX5<br>(Fragment)                                    | DDX5        | 5  | 9  | 69.1  | 0.130288018 |
| Serine/arginine-rich-<br>splicing factor 7                                          | SRSF7       | 1  | 2  | 15.8  | 0.126961415 |
| Small nuclear<br>ribonucleoprotein-<br>associated protein                           |             | 2  | 3  | 23.6  | 0.12689727  |
| Heterogeneous nuclear<br>ribonucleoprotein D0<br>(Fragment)                         | HNRNPD      | 1  | 3  | 23.9  | 0.125490575 |
| cDNA FLJ54552, highly<br>similar to<br>Heterogeneous nuclear<br>ribonucleoprotein K |             | 1  | 6  | 48.5  | 0.123761892 |
| Spliceosome RNA<br>helicase DDX39B                                                  | DDX39B      |    | 6  | 49.0  | 0.12254916  |
| Heterogeneous nuclear<br>ribonucleoprotein H                                        | HNRNPH1     | 4  | 6  | 49.2  | 0.121955158 |
| Albumin (Fragment)                                                                  |             | 7  | 8  | 66.5  | 0.120322492 |
| RNA-binding protein 25                                                              | RBM25       | 13 | 12 | 100.1 | 0.119850882 |
| Elongation factor 1-<br>alpha 2                                                     | EEF1A2      | 3  | 6  | 50.4  | 0.118957198 |
| SFPQ protein<br>(Fragment)                                                          | SFPQ        | 9  | 8  | 68.6  | 0.116638618 |
| Splicing factor 3A<br>subunit 1                                                     | SF3A1       | 9  | 10 | 88.8  | 0.112573928 |
| Probable ATP-<br>dependent RNA helicase<br>DDX17                                    | DDX17       | 7  | 9  | 80.2  | 0.112213764 |
| 14-3-3 protein sigma                                                                | SFN         |    | 3  | 27.8  | 0.108082033 |



|                                                                                                               |         |    |    |       |             |
|---------------------------------------------------------------------------------------------------------------|---------|----|----|-------|-------------|
| U2 small nuclear RNA auxillary factor 1 isoform a                                                             | U2AF1   | 1  | 3  | 27.9  | 0.107698978 |
| Protein arginine N-methyltransferase 1                                                                        | PRMT1   | 1  | 4  | 37.7  | 0.106143477 |
| DNA damage-binding protein 1                                                                                  | DDB1    | 12 | 13 | 126.9 | 0.102453099 |
| cDNA FLJ44500 fis, clone UTERU3000828, highly similar to 116 kDa U5 small nuclear ribonucleoprotein component |         | 10 | 11 | 108.1 | 0.101718375 |
| Receptor of-activated protein C kinase 1                                                                      | RACK1   |    | 3  | 29.7  | 0.100902219 |
| Serum paraoxonase/arylesterase 1                                                                              | PON1    |    | 4  | 39.7  | 0.100739859 |
| Parafibromin                                                                                                  | CDC73   | 5  | 6  | 60.5  | 0.099109524 |
| Heterogeneous nuclear ribonucleoprotein A/B                                                                   | HNRNPAB | 1  | 3  | 30.3  | 0.09906227  |
| Ribulose-5-phosphate-3-epimerase, isoform CRA_a                                                               | R       |    | 2  | 21.0  | 0.095427876 |
| cDNA, FLJ96764, highly similar to Homo sapiens sorting nexin 8 (SNX8), mRNA                                   |         |    | 5  | 52.6  | 0.09512191  |
| Mitotic interactor and substrate of PLK1                                                                      | MISP    | 6  | 7  | 75.3  | 0.092947966 |
| E3 ubiquitin-protein ligase TRIM21                                                                            | TRIM21  | 6  | 5  | 54.1  | 0.092361474 |
| RAB1B protein                                                                                                 | RAB1B   |    | 2  | 22.2  | 0.090154088 |
| Serine/threonine-protein phosphatase (Fragment)                                                               | PPP1CC  | 2  | 3  | 33.8  | 0.088884113 |
| cDNA, FLJ96225, highly similar to Homo sapiens heat shock 70kDa protein 1-like (HSPA1L), mRNA                 |         | 5  | 6  | 70.3  | 0.085309343 |
| Gelsolin                                                                                                      | GSN     | 1  | 7  | 82.5  | 0.084874895 |
| Heterogeneous nuclear ribonucleoprotein U-like 1, isoform CRA_a                                               | HNRPUL1 | 6  | 7  | 84.7  | 0.082604635 |

|                                                                                                            |                |    |    |       |             |
|------------------------------------------------------------------------------------------------------------|----------------|----|----|-------|-------------|
| Heterogeneous nuclear ribonucleoprotein H3                                                                 | HNRNPH3        |    | 3  | 36.9  | 0.08129402  |
| Spectrin alpha chain, non-erythrocytic 1                                                                   | SPTAN1         | 27 | 23 | 284.4 | 0.080882186 |
| Protein FAM207A                                                                                            | FAM207A        |    | 2  | 25.4  | 0.078613852 |
| Neurabin-2                                                                                                 | PPP1R9B        | 6  | 7  | 89.1  | 0.078530181 |
| Coronin                                                                                                    |                | 3  | 4  | 53.2  | 0.075202111 |
| U5 small nuclear ribonucleoprotein 200 kDa helicase                                                        | SNRNP200       | 13 | 18 | 244.4 | 0.073664033 |
| Inter-alpha-trypsin inhibitor heavy chain H3                                                               | ITIH3          |    | 5  | 75.0  | 0.066639045 |
| cDNA, FLJ94229, highly similar to Homo sapiens heterogeneous nuclear ribonucleoprotein L (HNRPL), mRNA     | HNRPL          | 1  | 4  | 60.2  | 0.066432815 |
| POLDIP3 protein (Fragment)                                                                                 | POLDIP3        |    | 3  | 45.6  | 0.065745771 |
| Heterogeneous nuclear ribonucleoprotein M                                                                  | HNRNPM         | 3  | 5  | 77.5  | 0.064500799 |
| cDNA, FLJ93681, highly similar to Homo sapiens small nuclear ribonucleoprotein polypeptide A (SNRPA), mRNA | SNRPA          | 2  | 2  | 31.3  | 0.063923892 |
| Fusion (Involved in t(12;16) in malignant liposarcoma) isoform a variant (Fragment)                        |                | 2  | 2  | 32.0  | 0.062550254 |
| Splicing factor 3B subunit 1                                                                               | SF3B1          | 12 | 9  | 145.7 | 0.061754613 |
| Heterogeneous nuclear ribonucleoprotein H2                                                                 | HNRNPH2        | 2  | 3  | 49.2  | 0.060935619 |
| Prothrombin (Fragment)                                                                                     |                |    | 2  | 33.6  | 0.059495512 |
| cDNA FLJ76187                                                                                              |                |    | 3  | 51.1  | 0.058722355 |
| Alpha-actinin-1                                                                                            | ACTN1          | 5  | 6  | 103.0 | 0.058256592 |
| Uncharacterized protein DKFZp686G11190                                                                     | DKFZp686G11190 | 2  | 3  | 52.0  | 0.057681245 |
| Cleavage and polyadenylation-specificity factor subunit 6                                                  | CPSF6          | 3  | 3  | 52.2  | 0.05742969  |

|                                                                                                       |          |   |    |       |             |
|-------------------------------------------------------------------------------------------------------|----------|---|----|-------|-------------|
| Anti-RhD monoclonal T125 gamma1 heavy chain                                                           |          | 2 | 3  | 52.3  | 0.057329269 |
| Immunoglobulin heavy constant gamma 4                                                                 | IGHG4    | 1 | 2  | 35.9  | 0.055682593 |
| ELAV-like protein 1                                                                                   | ELAVL1   |   | 2  | 36.1  | 0.055449045 |
| Endoplasmic reticulum chaperone BiP                                                                   | HSPA5    | 5 | 4  | 72.3  | 0.055333882 |
| cDNA FLJ76817, highly similar to Homo sapiens non-POU domain containing, octamer-binding (NONO), mRNA | NONO     | 6 | 3  | 54.3  | 0.055296105 |
| La-related protein 1 (Fragment)                                                                       | LARP1    |   | 5  | 90.8  | 0.055086206 |
| Pre-mRNA-processing factor 19                                                                         | PRPF19   | 1 | 3  | 55.1  | 0.054400703 |
| Desmoplakin                                                                                           | DSP      | 6 | 18 | 331.6 | 0.054287389 |
| Thrombospondin 1, isoform CRA_a                                                                       | THBS1    |   | 7  | 129.3 | 0.054150416 |
| MAP kinase-activated protein kinase 5 (Fragment)                                                      | MAPKAPK5 |   | 2  | 37.1  | 0.053969641 |
| Poly(rC)-binding protein 1                                                                            | PCBP1    | 2 | 2  | 37.5  | 0.053370415 |
| Serum paraoxonase/lactonase 3                                                                         | PON3     |   | 2  | 39.6  | 0.050527596 |
| cDNA FLJ53422, highly similar to TATA-binding protein-associated factor 2N                            |          | 1 | 2  | 40.1  | 0.049932339 |
| Plakophilin 1 (Ectodermal dysplasia/skin fragility syndrome), isoform CRA_a                           | PKP1     |   | 4  | 80.4  | 0.04972313  |
| Zinc finger transcription factor Trps1                                                                | TRPS1    |   | 7  | 141.4 | 0.049493624 |
| Archaemetzincins-2, isoform CRA_d                                                                     | AMZ2     | 3 | 2  | 41.2  | 0.048499    |
| Inter-alpha-trypsin inhibitor heavy chain H2                                                          | ITI2     |   | 5  | 105.2 | 0.04755108  |
| cDNA: FLJ23531 fis, clone LNG06065                                                                    |          |   | 2  | 46.5  | 0.043001727 |

|                                                                                                  |                |   |   |       |             |
|--------------------------------------------------------------------------------------------------|----------------|---|---|-------|-------------|
| X-ray repair cross-complementing protein 6                                                       | XRCC6          |   | 3 | 69.8  | 0.042980523 |
| Zinc finger RNA binding protein                                                                  | ZFR            |   | 5 | 116.9 | 0.042756639 |
| Complement C4-A                                                                                  | C4A            |   | 8 | 187.6 | 0.042633494 |
| Elongation factor 2                                                                              | EEF2           |   | 4 | 95.3  | 0.04198287  |
| Unconventional myosin-Ib                                                                         | MYO1B          | 1 | 5 | 128.4 | 0.03894082  |
| CDC2L2 protein (Fragment)                                                                        | CDC2L2         | 2 | 2 | 52.4  | 0.038187312 |
| Serpin peptidase inhibitor clade C member 1                                                      | SERPINC1       |   | 2 | 52.5  | 0.038088832 |
| cDNA FLJ35987 fis, clone TESTI2014269, highly similar to D-3-phosphoglycerate dehydrogenase      |                |   | 2 | 53.0  | 0.037750509 |
| Complement C5                                                                                    | C5             |   | 7 | 188.2 | 0.037197213 |
| Uncharacterized protein DKFZp686C06243 (Fragment)                                                | DKFZp686C06243 |   | 7 | 195.5 | 0.035801124 |
| ATP-dependent RNA helicase A                                                                     | DHX9           | 6 | 5 | 140.9 | 0.035493941 |
| Complement C2                                                                                    | C2             |   | 2 | 56.4  | 0.035441856 |
| Heterogeneous nuclear ribonucleoprotein U-like protein 2                                         | HNRNPUL2       |   | 3 | 85.1  | 0.035272468 |
| Nucleolar RNA helicase 2                                                                         | DDX21          |   | 3 | 87.3  | 0.034368046 |
| cDNA FLJ78246, highly similar to Homo sapiens splicing factor 3a, subunit 3, 60kDa (SF3A3), mRNA | SF3A3          | 1 | 2 | 58.8  | 0.034040089 |
| cDNA, FLJ93914, highly similar to Homo sapiens histidine-rich glycoprotein (HRG), mRNA           |                |   | 2 | 59.5  | 0.033627697 |
| cDNA FLJ59523, highly similar to Scaffold attachment factor B                                    |                | 2 | 3 | 91.0  | 0.032956029 |

|                                                                                                         |         |    |   |       |             |
|---------------------------------------------------------------------------------------------------------|---------|----|---|-------|-------------|
| cDNA FLJ43122 fis, clone CTONG3003737, highly similar to Leucine-rich repeat-containing protein 15 OS   |         |    | 2 | 64.4  | 0.031078468 |
| Alpha-2-macroglobulin                                                                                   | A2M     |    | 5 | 163.2 | 0.030639527 |
| Spectrin beta chain, non-erythrocytic 1                                                                 | SPTBN1  | 14 | 8 | 274.4 | 0.029150408 |
| ATP-dependent RNA helicase DDX3X                                                                        | DDX3X   | 1  | 2 | 69.0  | 0.028983444 |
| FN1 protein                                                                                             | FN1     |    | 7 | 246.5 | 0.028392574 |
| Nuclear cap-binding protein subunit 3                                                                   | NCBP3   |    | 2 | 70.5  | 0.028348956 |
| Pre-mRNA-processing factor 6                                                                            | PRPF6   | 5  | 3 | 106.9 | 0.028074694 |
| Scaffold attachment factor B2                                                                           | SAFB2   | 2  | 3 | 107.4 | 0.027930859 |
| Pre-mRNA-processing-splicing factor 8                                                                   | PRPF8   | 7  | 7 | 273.4 | 0.025601023 |
| THO complex subunit 5 homolog                                                                           | THOC5   |    | 2 | 78.5  | 0.025491366 |
| cDNA FLJ76877, highly similar to Homo sapiens superkiller viralicidic activity 2-like 2 (SKIV2L2), mRNA |         | 1  | 3 | 117.8 | 0.025461829 |
| FACT complex subunit SPT16                                                                              | SUPT16H | 6  | 3 | 119.8 | 0.025033707 |
| cDNA FLJ57339, highly similar to Complement C3                                                          |         |    | 3 | 122.5 | 0.024486736 |
| Uncharacterized protein                                                                                 |         |    | 3 | 123.9 | 0.024205799 |
| X-ray repair cross-complementing protein 5                                                              | XRCC5   |    | 2 | 82.7  | 0.02419776  |
| FAST kinase domain-containing protein 5, mitochondrial                                                  | FASTKD5 |    | 2 | 86.5  | 0.023116409 |
| cDNA FLJ55635, highly similar to pre-mRNA-splicing factorATP-dependent RNA helicase DHX15               | dhx15   | 4  | 2 | 89.5  | 0.022348728 |

|                                                                                   |        |    |   |       |             |
|-----------------------------------------------------------------------------------|--------|----|---|-------|-------------|
| Nuclear cap-binding protein subunit 1                                             | NCBP1  | 1  | 2 | 91.8  | 0.021791116 |
| Matrin-3                                                                          | MATR3  |    | 2 | 94.6  | 0.021149518 |
| Pp100                                                                             | U11    |    | 2 | 97.1  | 0.020595118 |
| Myosin IC, isoform CRA_a                                                          | MYO1C  |    | 2 | 98.9  | 0.020228139 |
| 5'-3' exoribonuclease                                                             |        |    | 2 | 99.9  | 0.02002241  |
| General transcription factor 3C polypeptide 2                                     | GTF3C2 |    | 2 | 100.6 | 0.0198776   |
| Spectrin beta chain, non-erythrocytic 2                                           | SPTBN2 | 20 | 5 | 271.2 | 0.018439493 |
| cDNA, FLJ94213, highly similar to Homo sapiens pregnancy-zone protein (PZP), mRNA |        |    | 3 | 163.8 | 0.018318638 |
| Nuclear mitotic apparatus protein 1                                               | NUMA1  | 5  | 4 | 236.0 | 0.016947786 |
| cDNA FLJ53573, highly similar to Myosin Ic                                        |        |    | 2 | 119.0 | 0.016809211 |
| Filamin A                                                                         | FLNA   | 4  | 4 | 277.3 | 0.014423127 |
| Coagulation factor V                                                              | F5     |    | 3 | 251.5 | 0.011926271 |
| DNA topoisomerase 2-beta                                                          | TOP2B  | 1  | 2 | 183.2 | 0.010919864 |
| DNA-dependent protein kinase catalytic subunit                                    | PRKDC  | 2  | 4 | 468.8 | 0.008532643 |
